# Supplementary material for: Regioselective C-3 arylation of coumarins with arylhydrazines via radical oxidation by potassium permanganate
Source: publisher site journal article supplement (doi:10.1515/znb-2016-0109), 2016-08-30
Supplement: Supplementary file 1 [file B16109-suppinfo2a.pdf › B16109-suppinfo2a.pdf]

# Supporting Information

## Regioselective C-3 arylation of coumarins with arylhydrazines via radical oxidation by potassium permanganate

Jin-Wei Yuan,\* Wei-Jie Li, Liang-Ru Yang, Pu Mao, Yong-Mei Xiao\*

School of Chemistry & Chemical Engineering, Henan University of Technology; Academician  
Workstation for Natural Medicinal Chemistry of Henan Province, Zhengzhou 450001, PR China

E-mail: [yuanjinweigs@126.com](mailto:yuanjinweigs@126.com) (Jin-Wei Yuan); [mxyy9510@126.com](mailto:mxyy9510@126.com) (Yong-Mei Xiao)

---

### Table of Contents

1. Screening of the reaction conditions
2. Copies of spectra of products

## 1. Screening of the reaction conditions

**Table S1** The yield of 3-phenylcoumarin (**3a**) was influenced by the ratio of coumarin (**1a**) to phenylhydrazine (**2a**)<sup>a</sup>

| Entry | Ratio of <b>1a</b> to <b>2a</b> | Yield (%) <sup>b</sup> |
|-------|---------------------------------|------------------------|
| 1     | 2:1                             | 40                     |
| 2     | 1:1                             | 60                     |
| 3     | 1:1.2                           | 65                     |
| 4     | 1:2                             | 85                     |
| 5     | 1:3                             | 75                     |

<sup>a</sup> Reaction conditions: coumarin **1** (0.5 mmol), phenylhydrazines **2**, KMnO<sub>4</sub> (1.5 mmol), CH<sub>3</sub>CN (10 mL) at 80 °C for 4.0 h.

<sup>b</sup> Isolated yields.

## 2. Copies of spectra of products

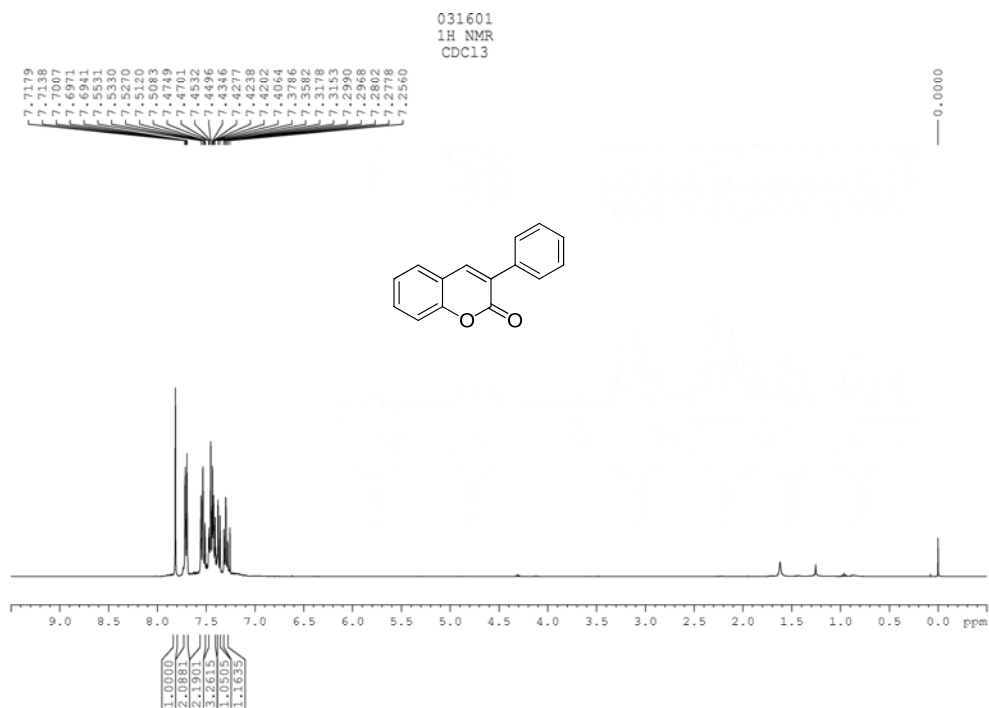

Fig. 1 <sup>1</sup>H NMR spectrum of 3a

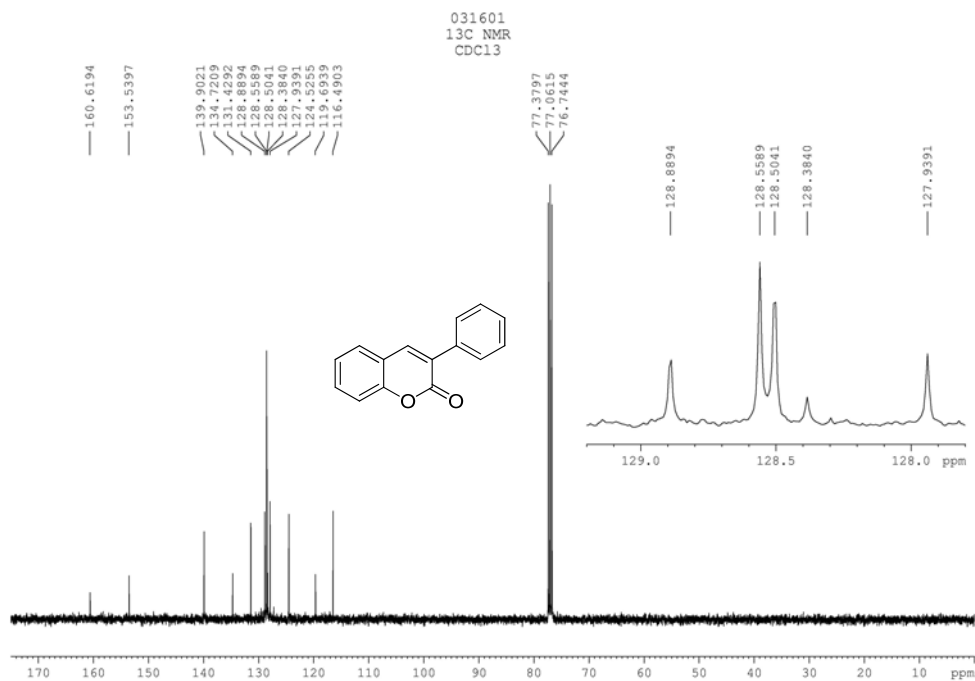

Fig. 2 <sup>13</sup>C NMR spectrum of 3a

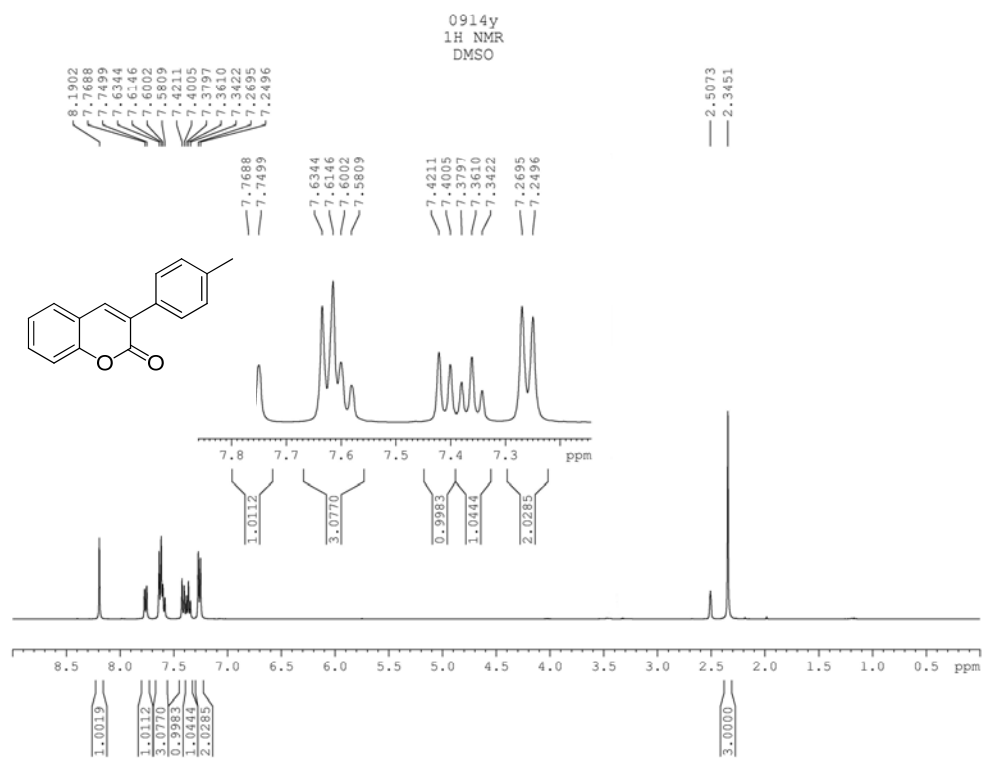

Fig. 3  $^1\text{H}$  NMR spectrum of **3b**

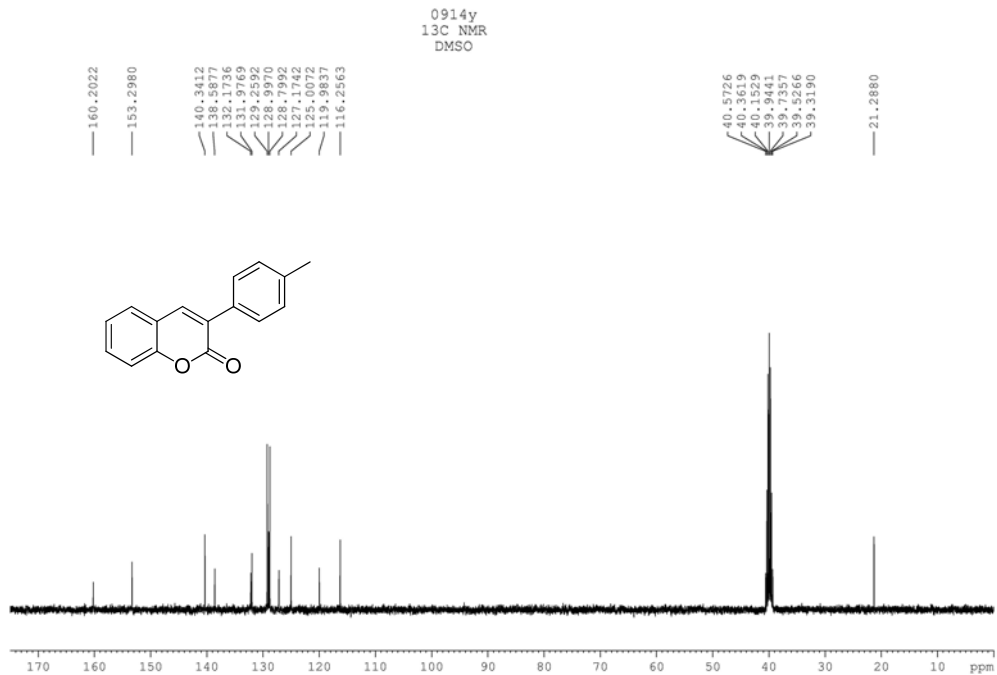

Fig. 4  $^{13}\text{C}$  NMR spectrum of **3b**

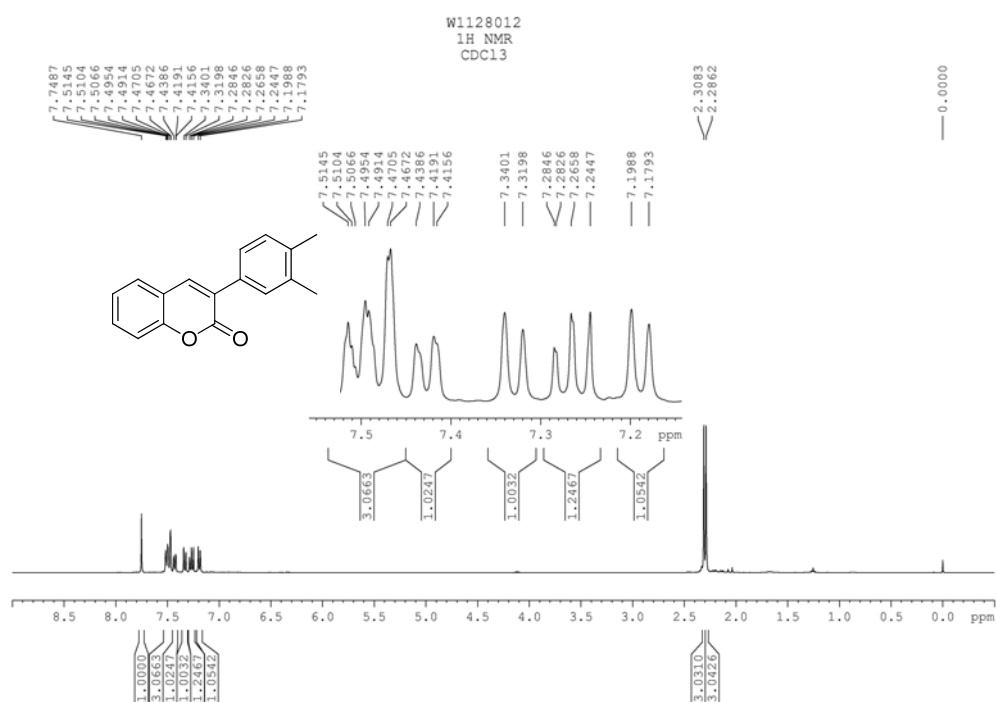

**Fig. 5** <sup>1</sup>H NMR spectrum of **3c**

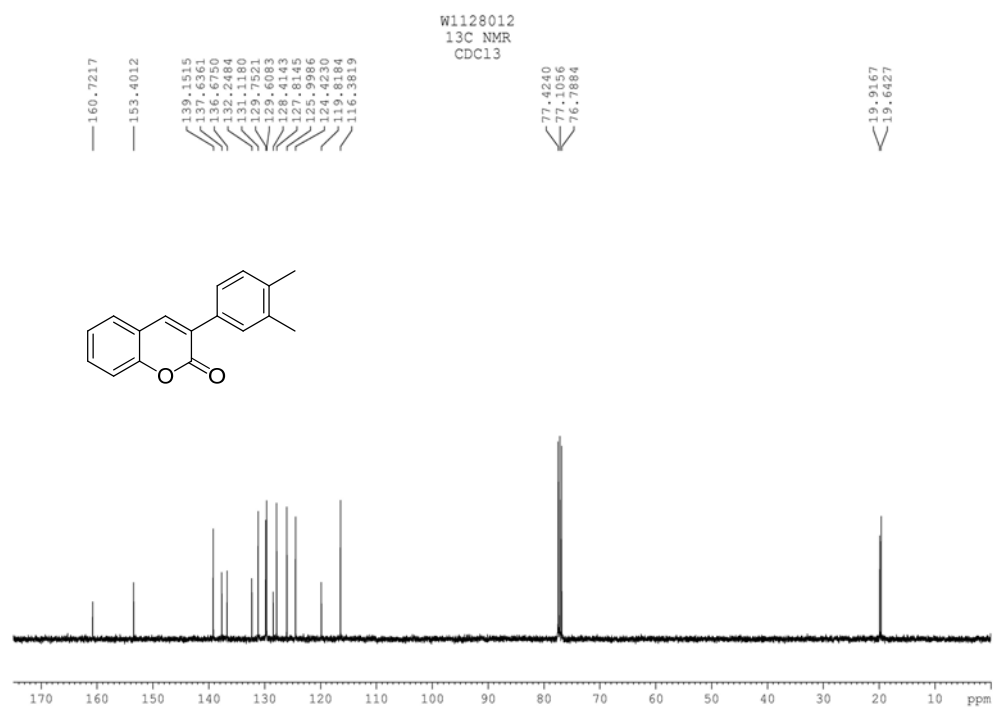

**Fig. 6** <sup>13</sup>C NMR spectrum of **3c**

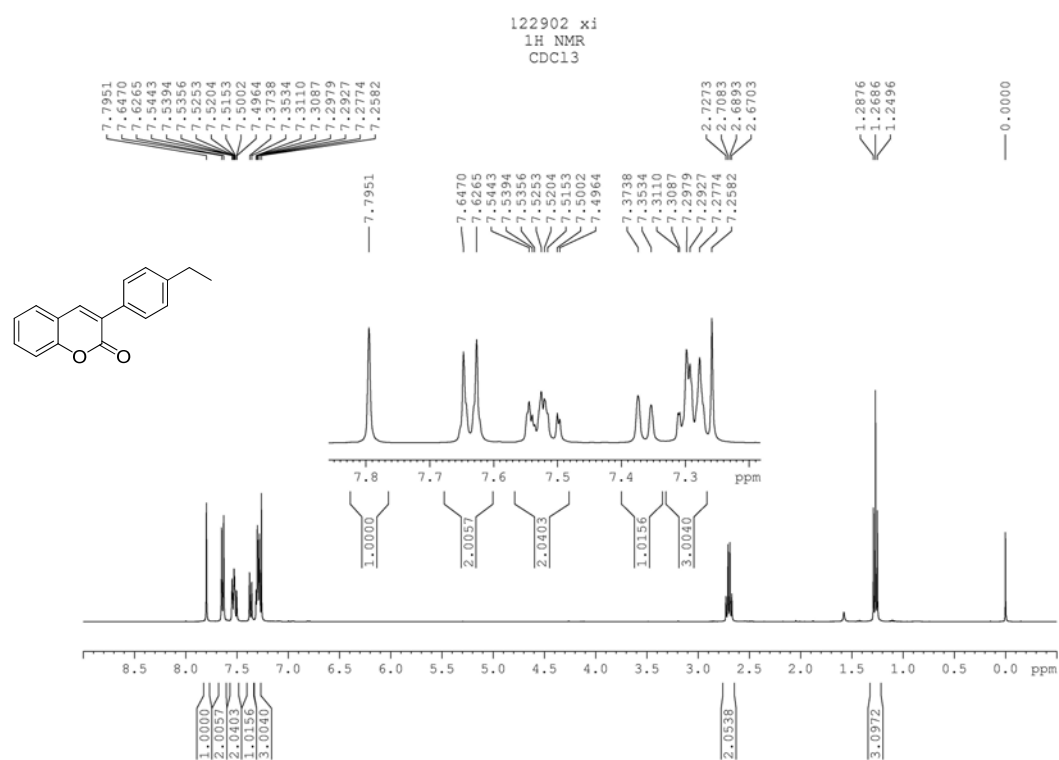

Fig. 7  $^1\text{H}$  NMR spectrum of **3d**

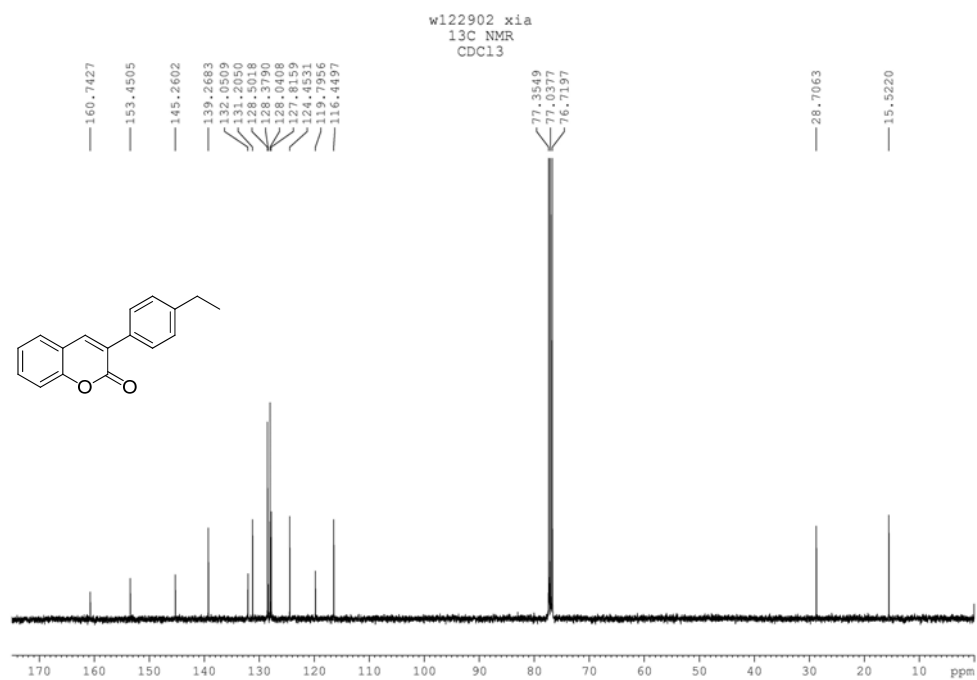

Fig. 8  $^{13}\text{C}$  NMR spectrum of **3d**

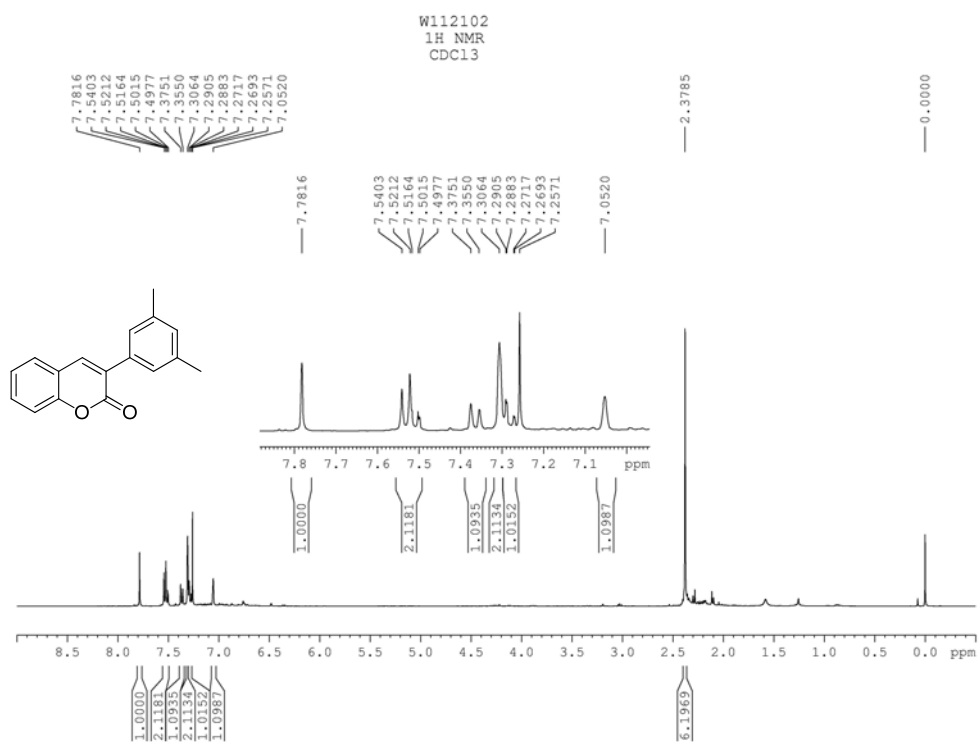

Fig. 9  $^1\text{H}$  NMR spectrum of **3e**

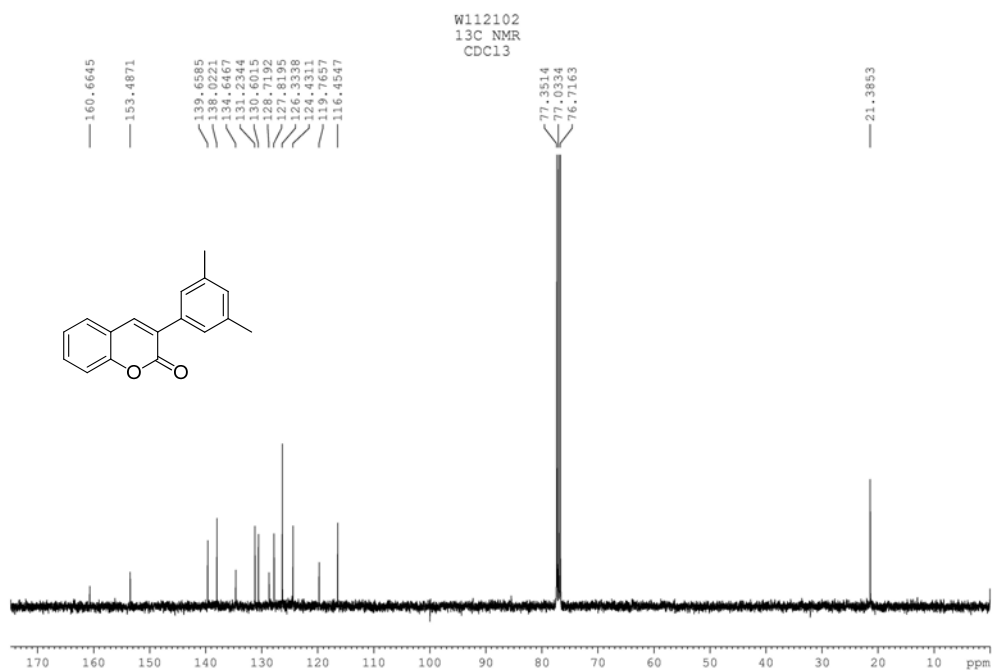

Fig. 10  $^{13}\text{C}$  NMR spectrum of **3e**

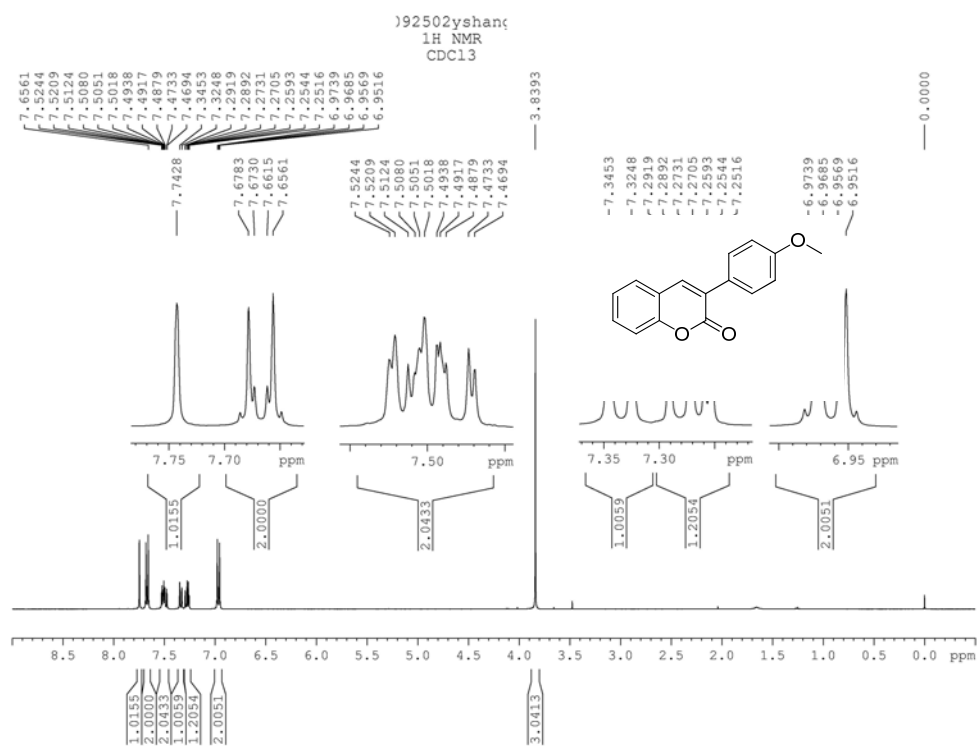

Fig. 11  $^1\text{H}$  NMR spectrum of **3f**

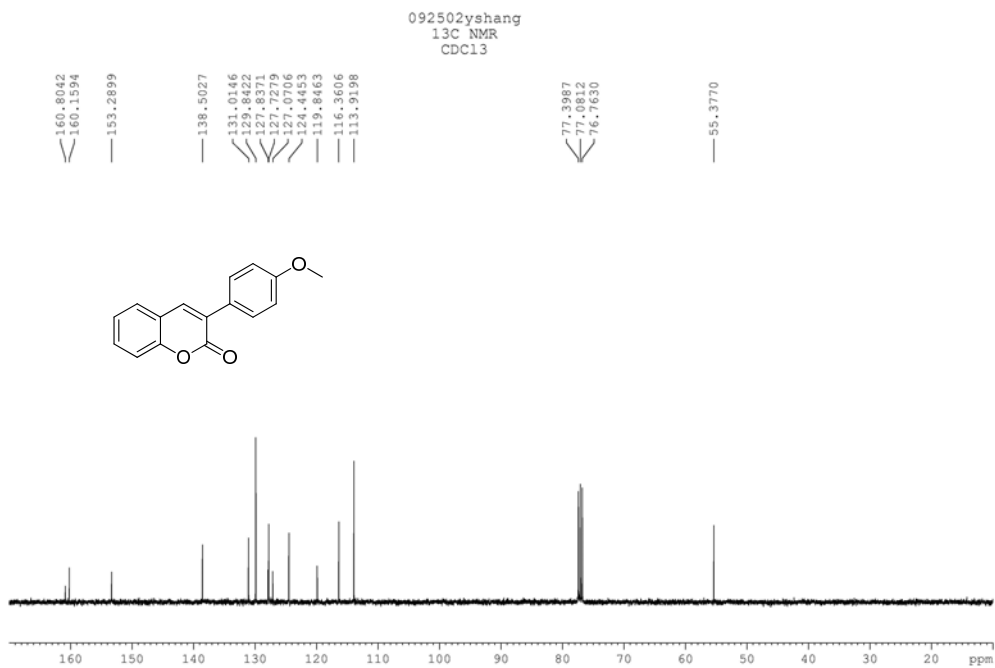

Fig. 12  $^{13}\text{C}$  NMR spectrum of **3f**



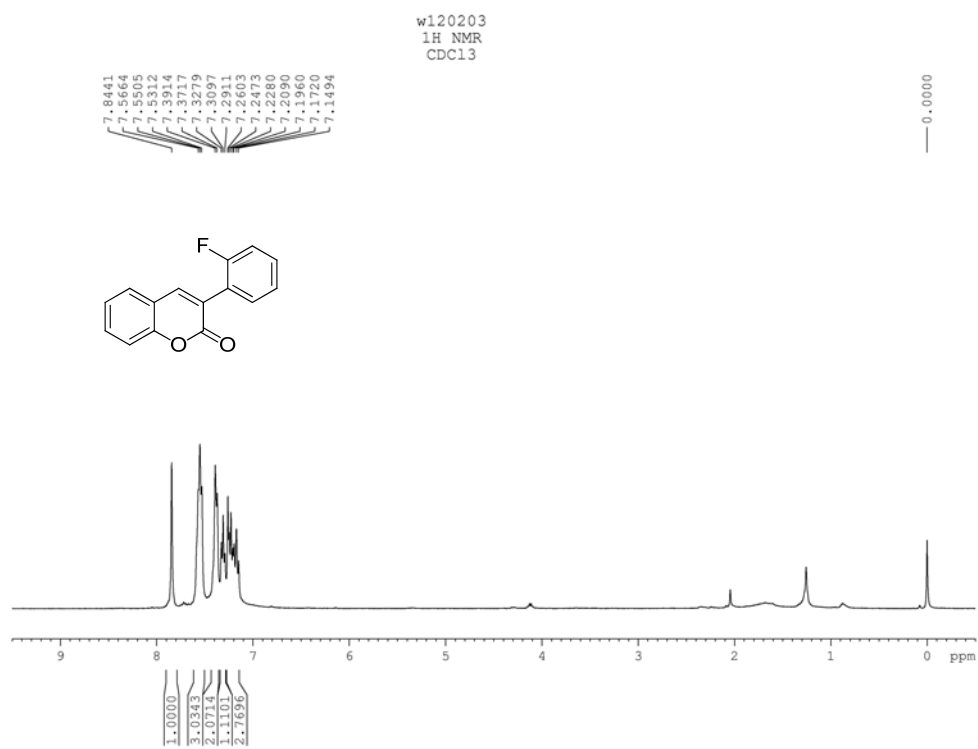

Fig. 13  $^1\text{H}$  NMR spectrum of **3g**

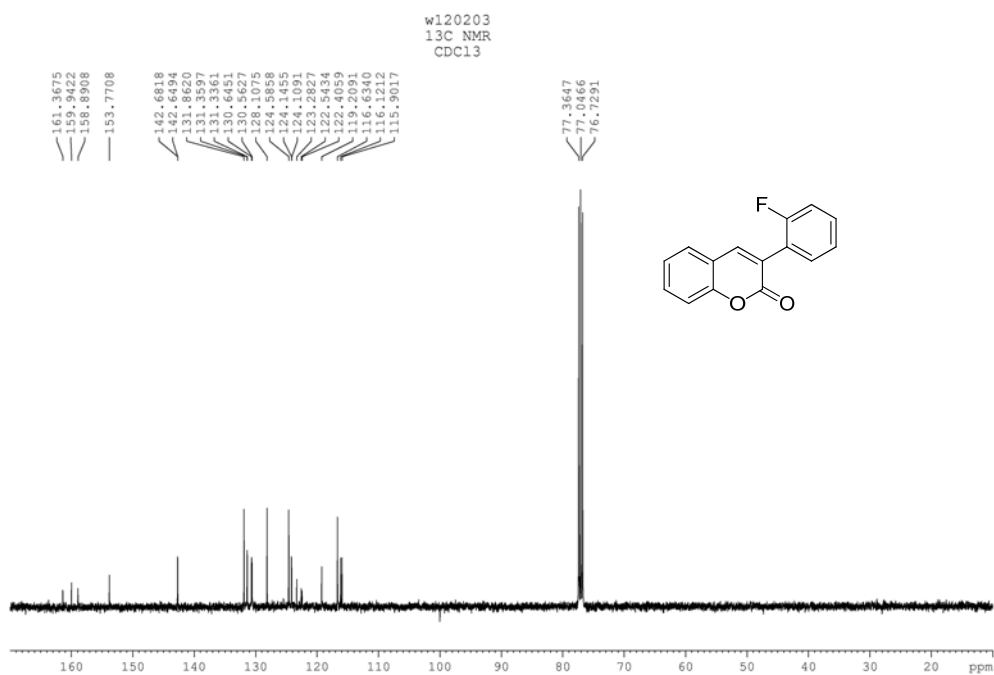

Fig. 14  $^{13}\text{C}$  NMR spectrum of **3g**

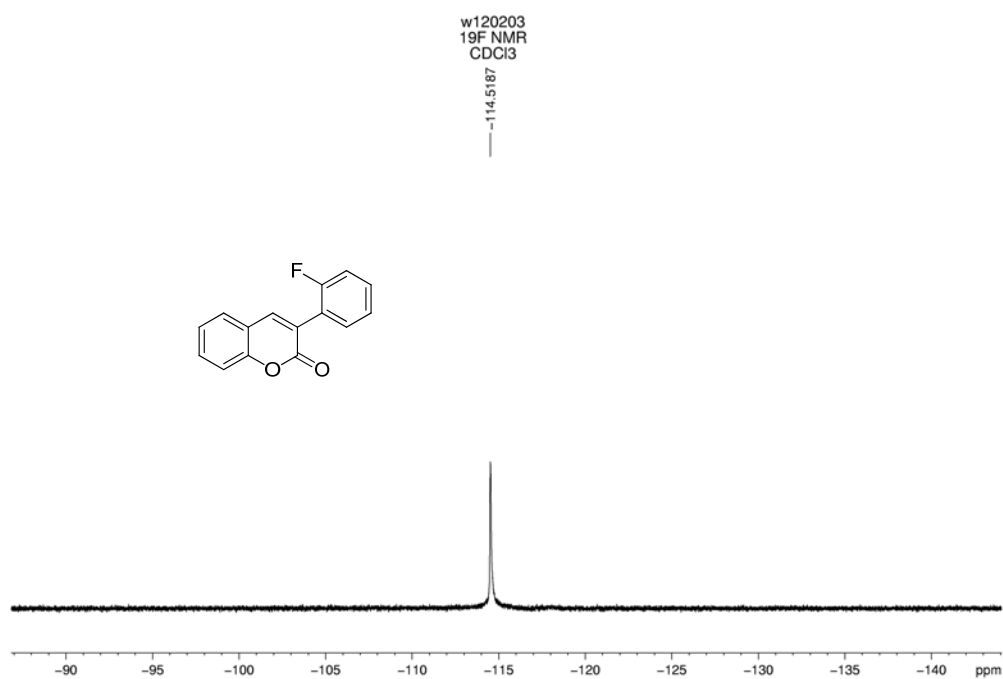

Fig. 15  $^{19}\text{F}$  NMR spectrum of **3g**

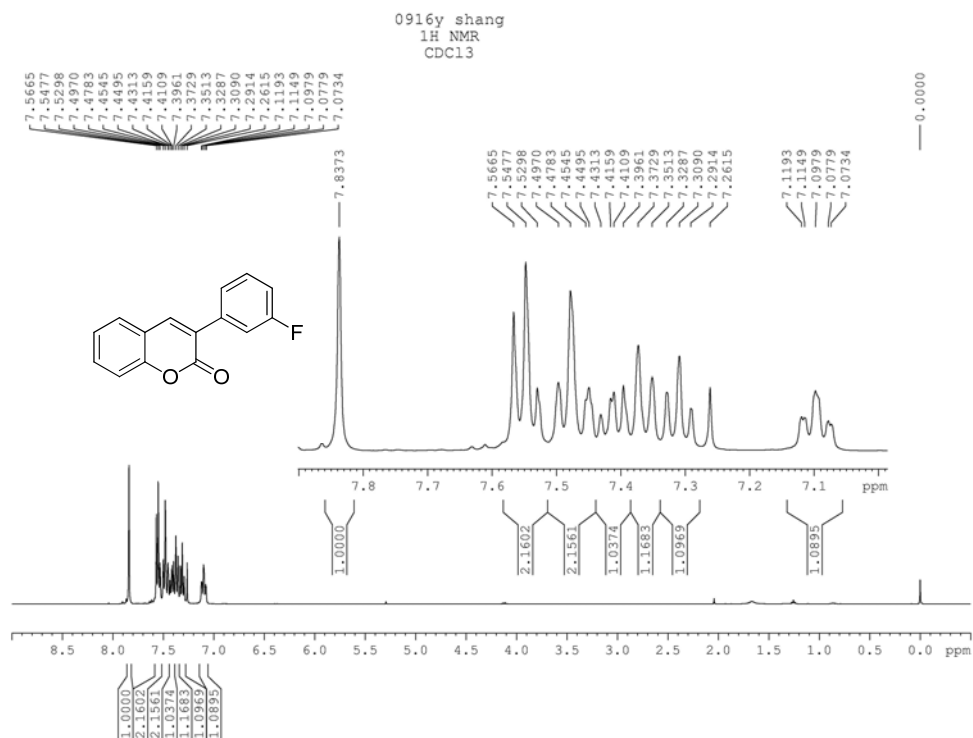

Fig. 16  $^1\text{H}$  NMR spectrum of **3h**

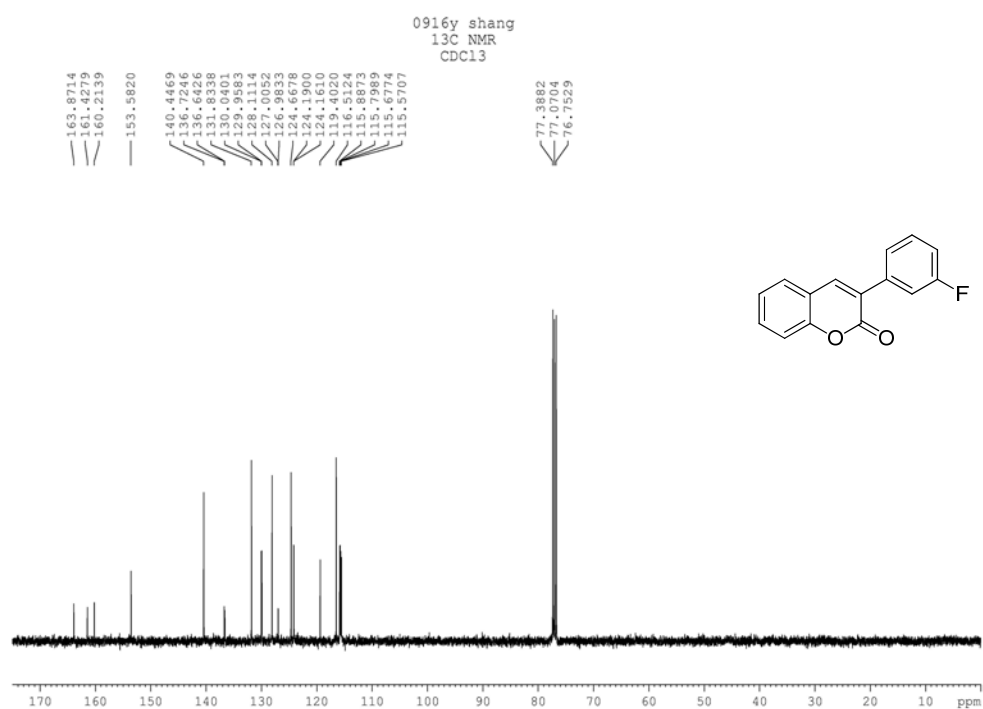

Fig. 17 <sup>13</sup>C NMR spectrum of **3h**

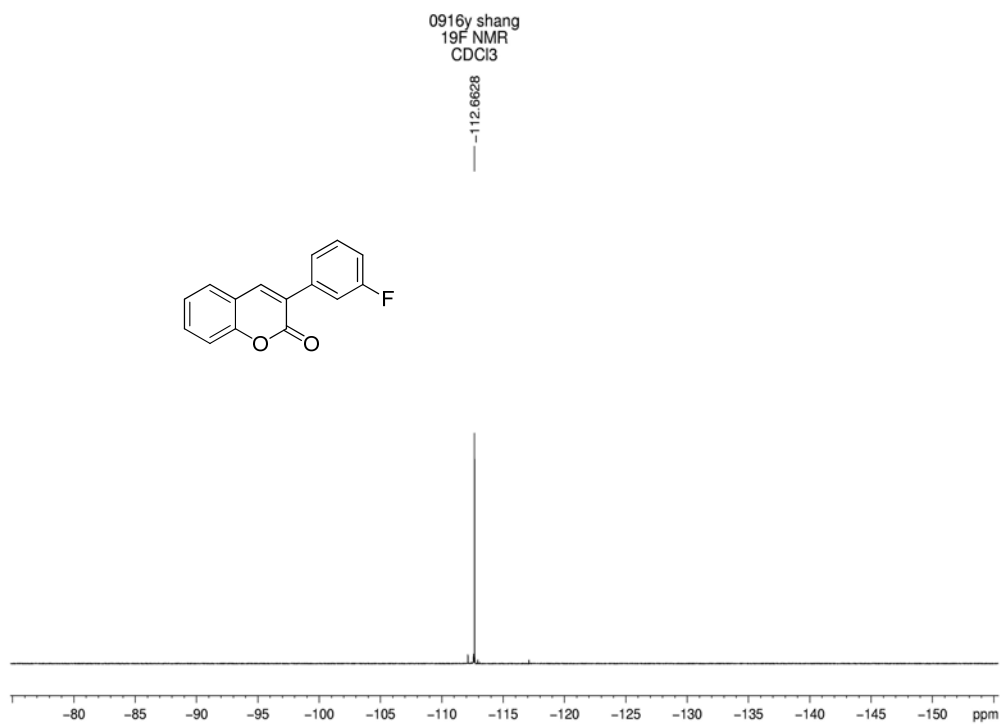

Fig. 18 <sup>19</sup>F NMR spectrum of **3h**

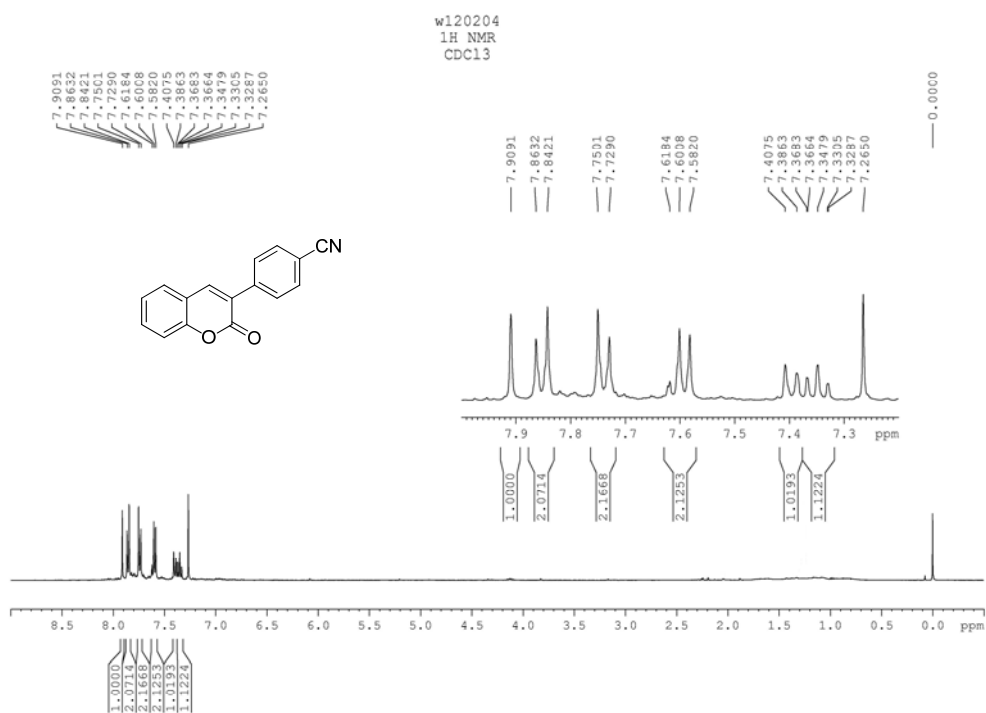

Fig. 19 <sup>1</sup>H NMR spectrum of **3i**

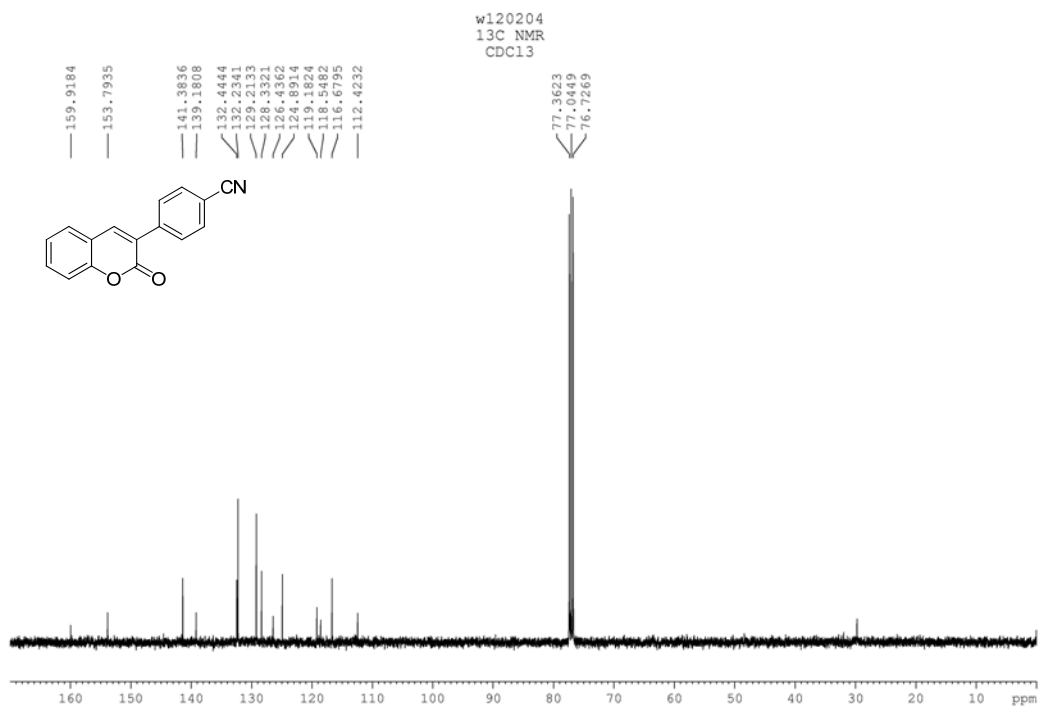

Fig. 20 <sup>13</sup>C NMR spectrum of **3i**

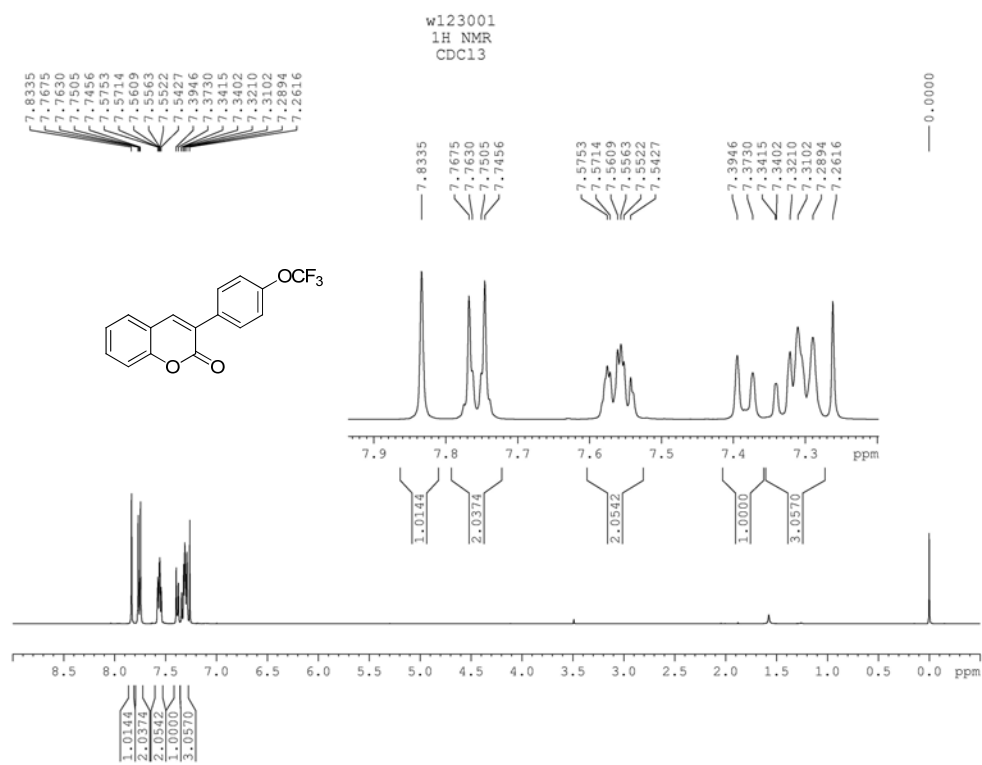

Fig. 21  $^1\text{H}$  NMR spectrum of **3j**

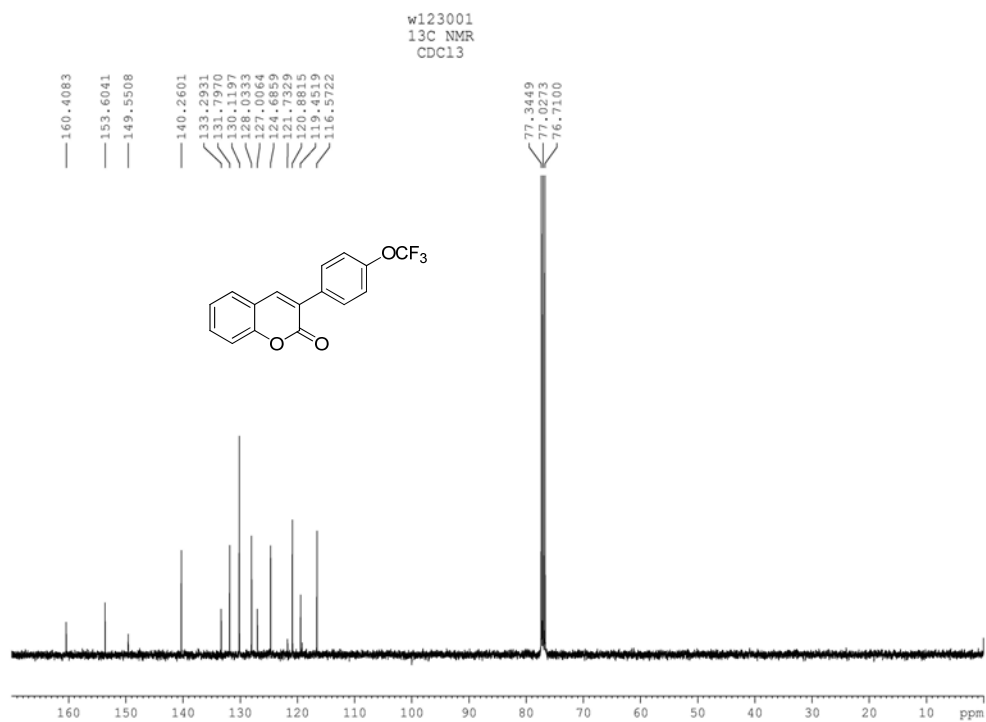

Fig. 22  $^{13}\text{C}$  NMR spectrum of **3j**

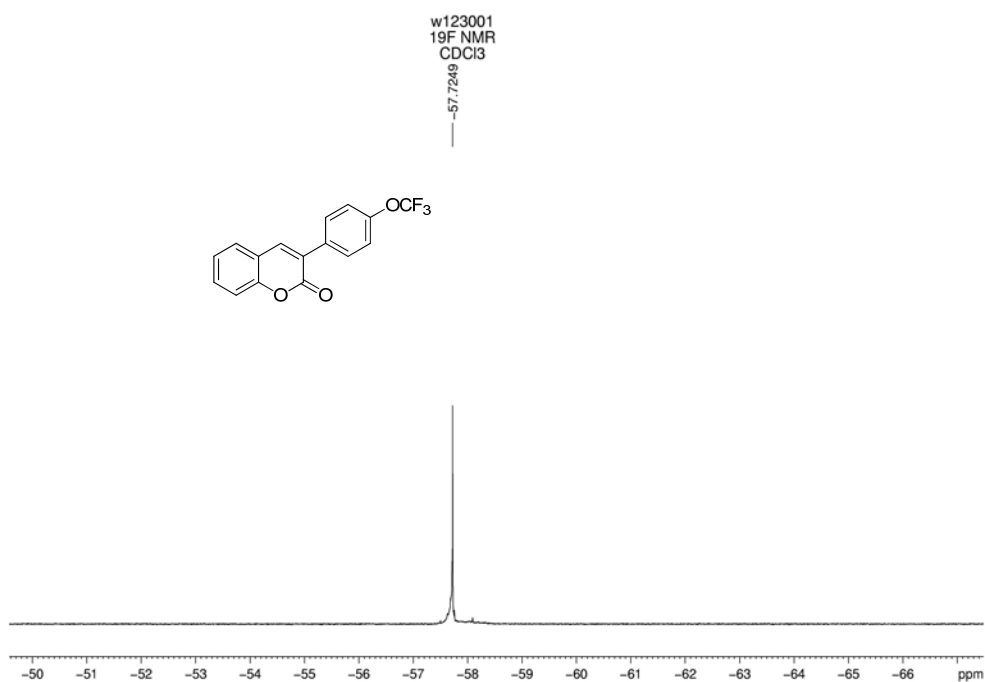

Fig. 23  $^{19}\text{F}$  NMR spectrum of **3j**

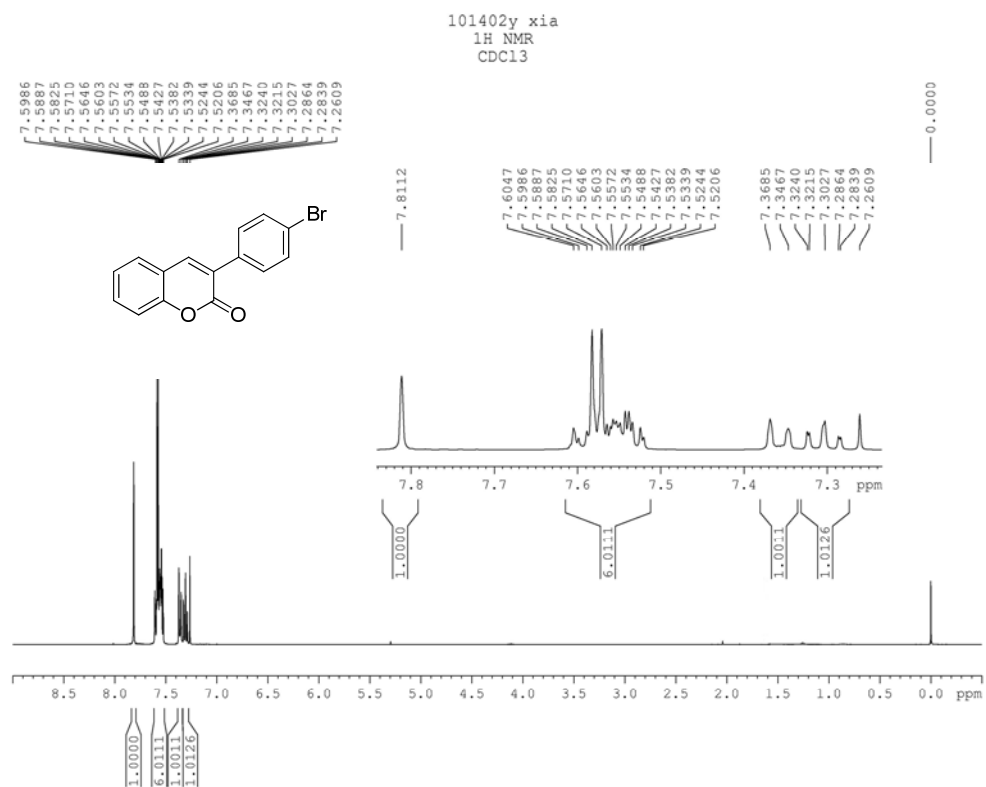

Fig. 24  $^1\text{H}$  NMR spectrum of **3l**

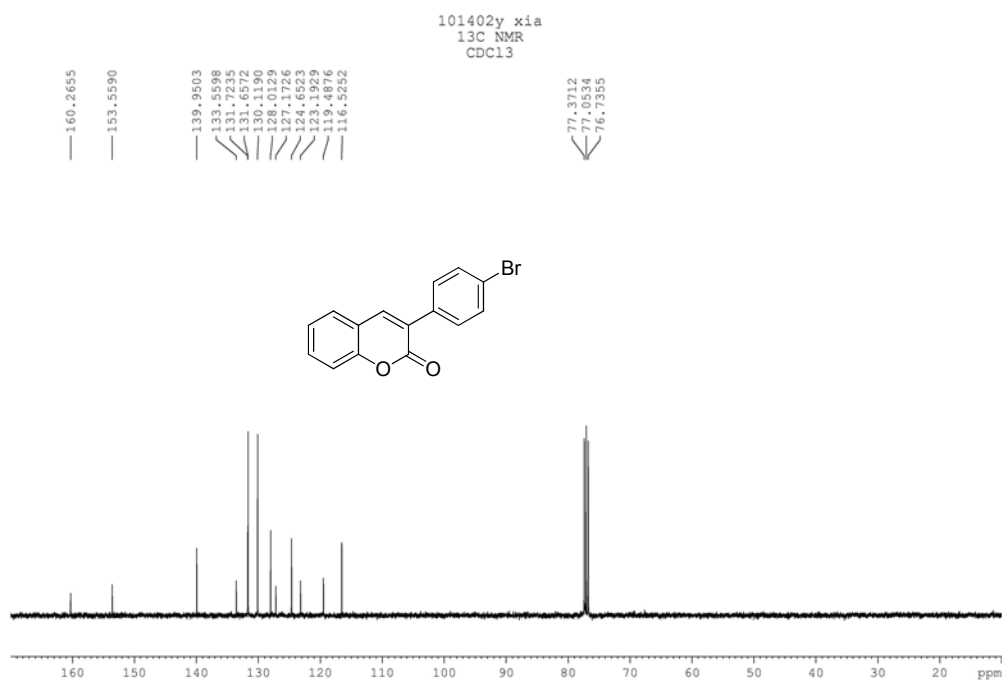

Fig. 25  $^{13}\text{C}$  NMR spectrum of **3l**

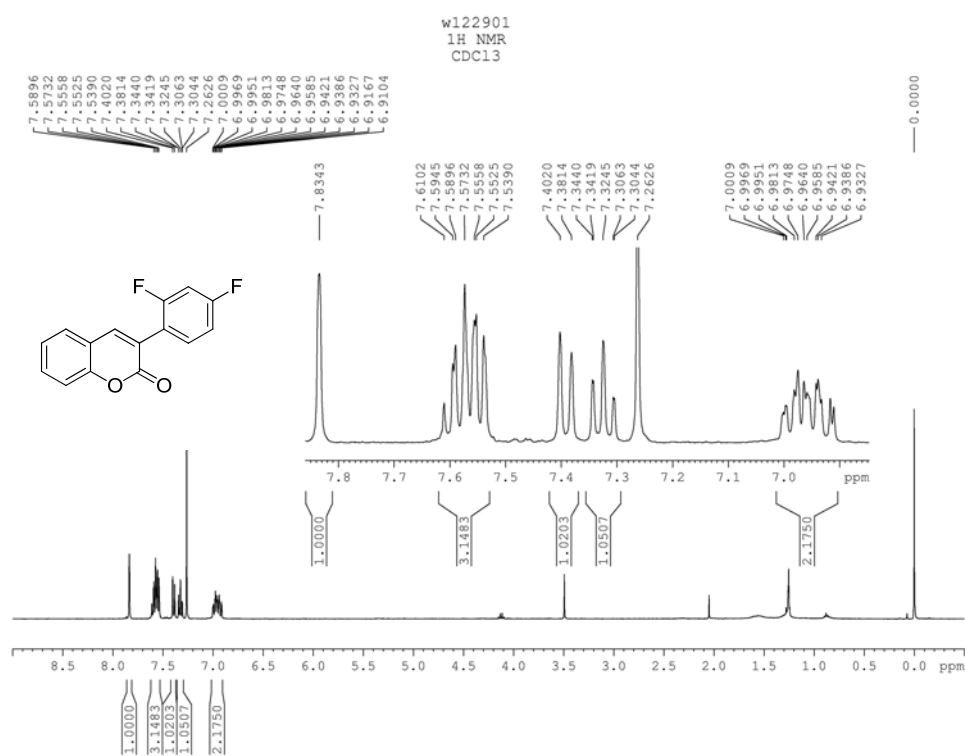

Fig. 26  $^1\text{H}$  NMR spectrum of **3m**

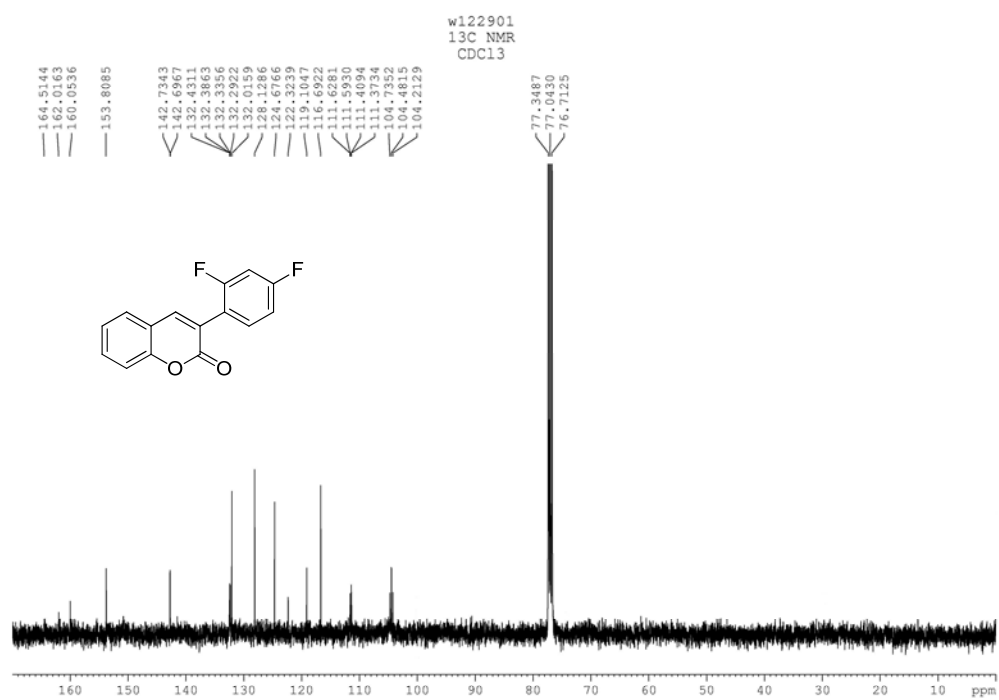

**Fig. 27**  $^{13}\text{C}$  NMR spectrum of **3m**

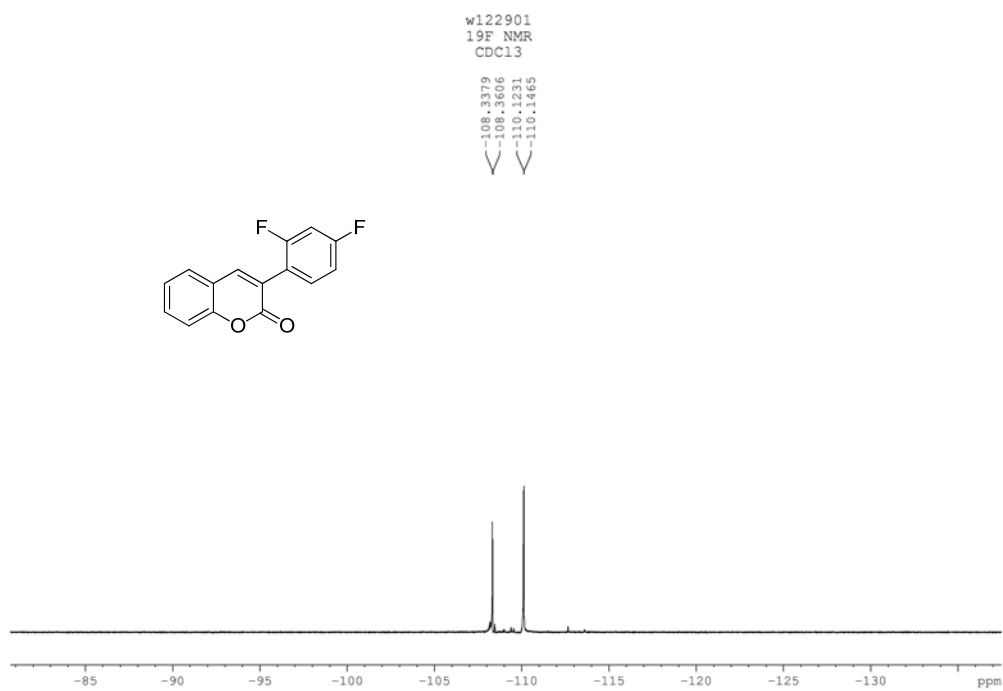

**Fig. 28**  $^{19}\text{F}$  NMR spectrum of **3m**



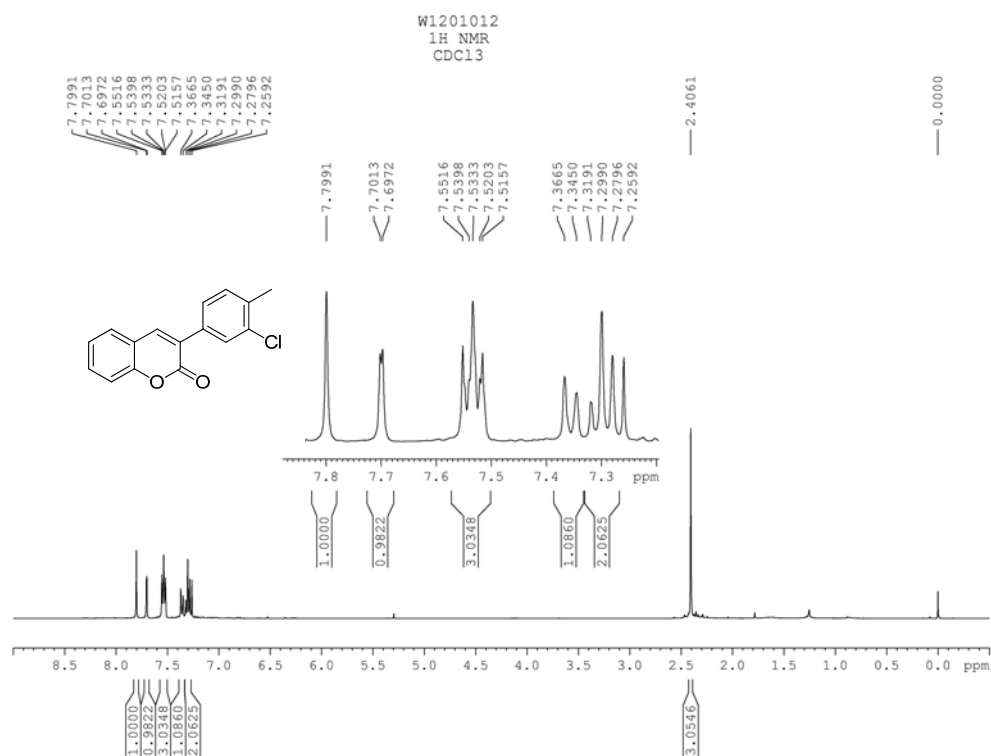

Fig. 29  $^1\text{H}$  NMR spectrum of 3n

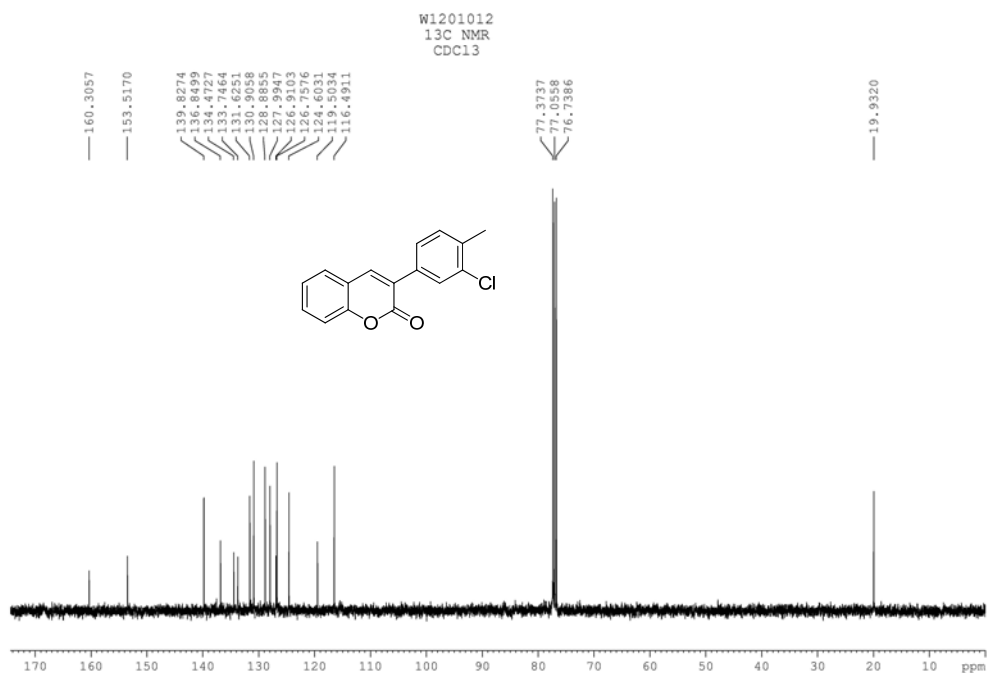

Fig. 30  $^{13}\text{C}$  NMR spectrum of 3n

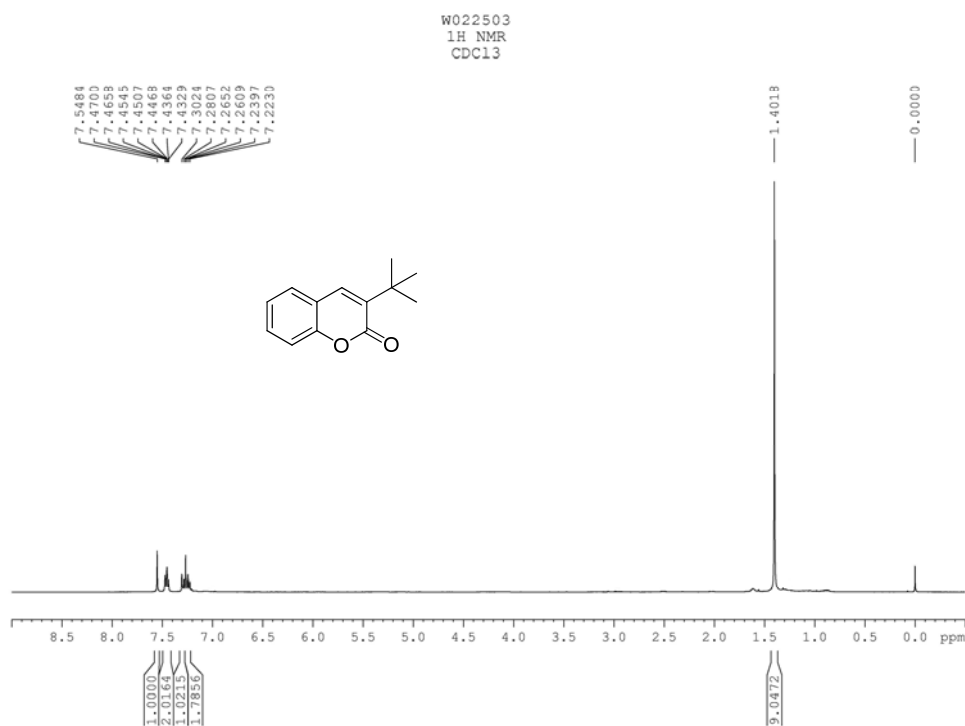

Fig. 31  $^1\text{H}$  NMR spectrum of **3o**

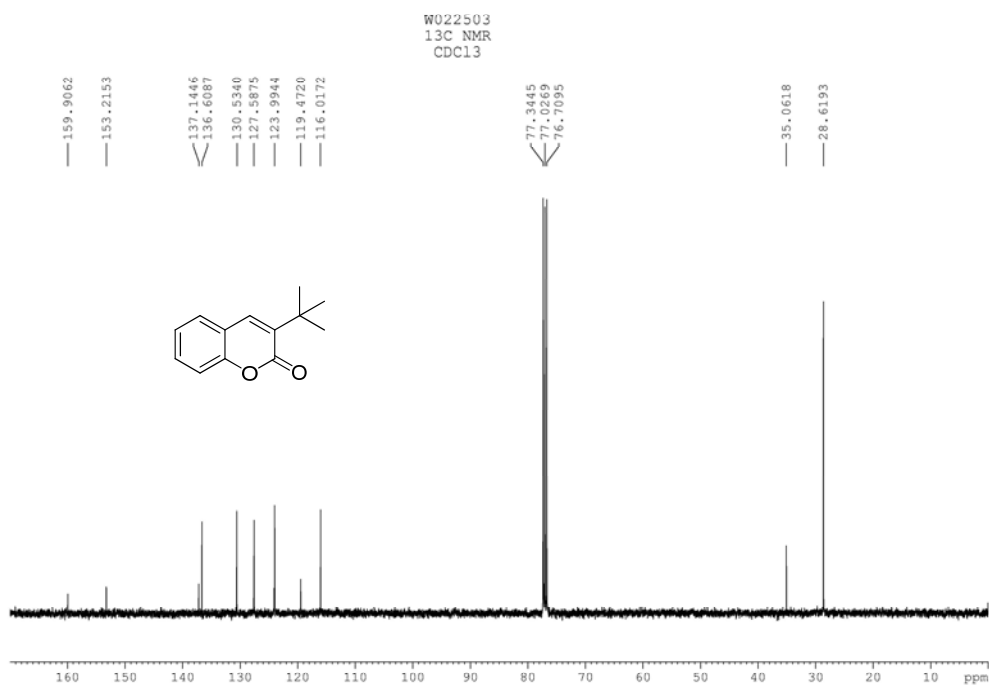

Fig. 32  $^{13}\text{C}$  NMR spectrum of **3o**

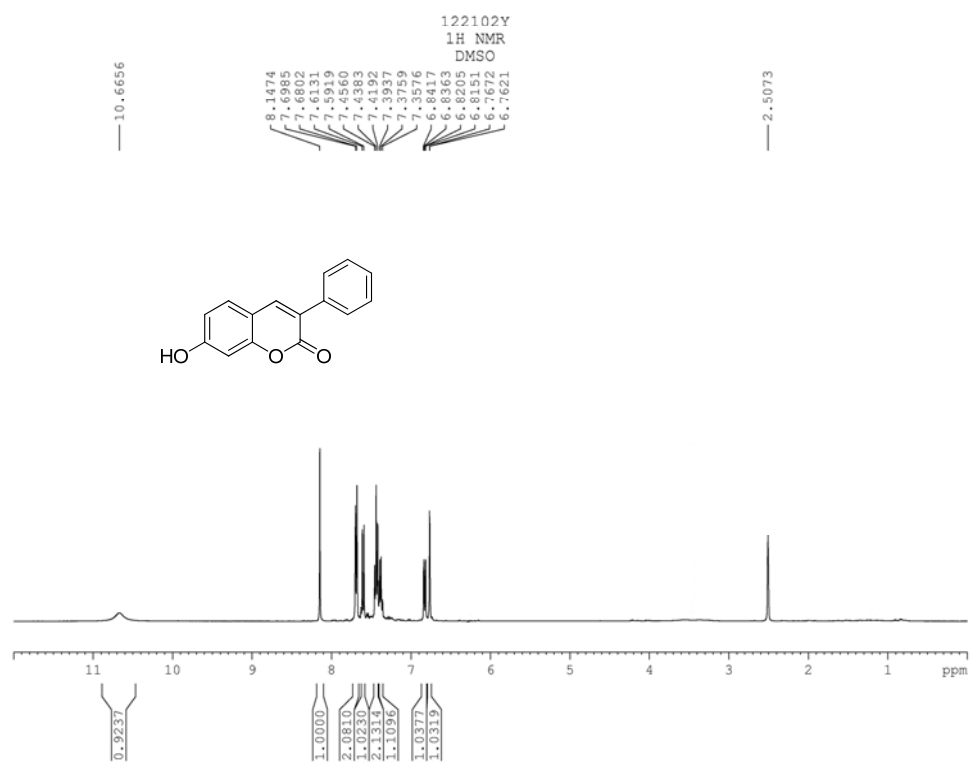

Fig. 33  $^1\text{H}$  NMR spectrum of **3p**

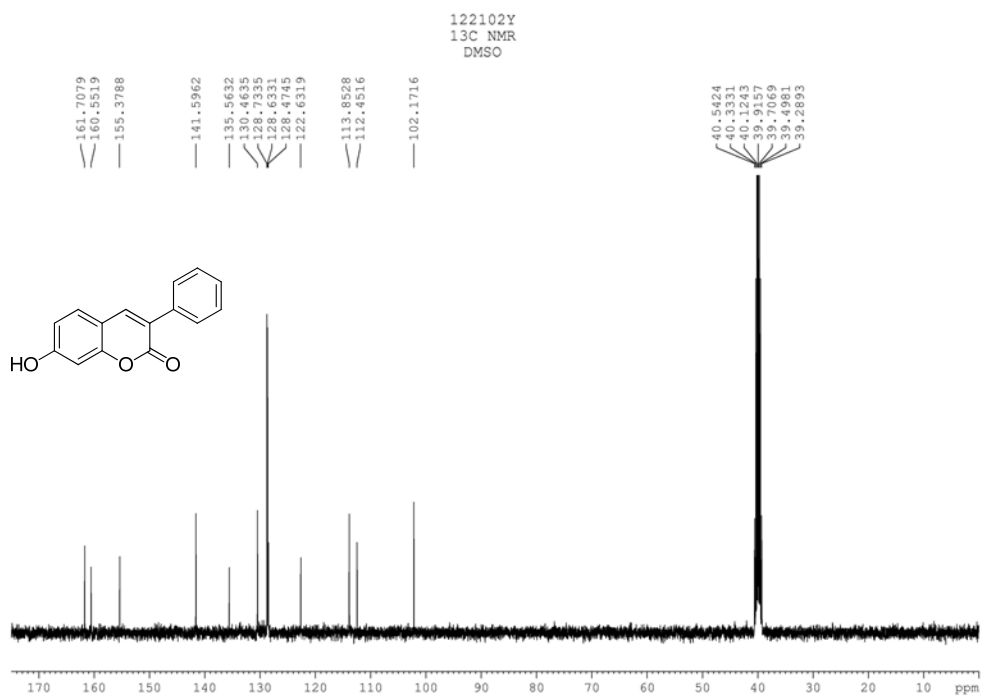

Fig. 34  $^{13}\text{C}$  NMR spectrum of **3p**



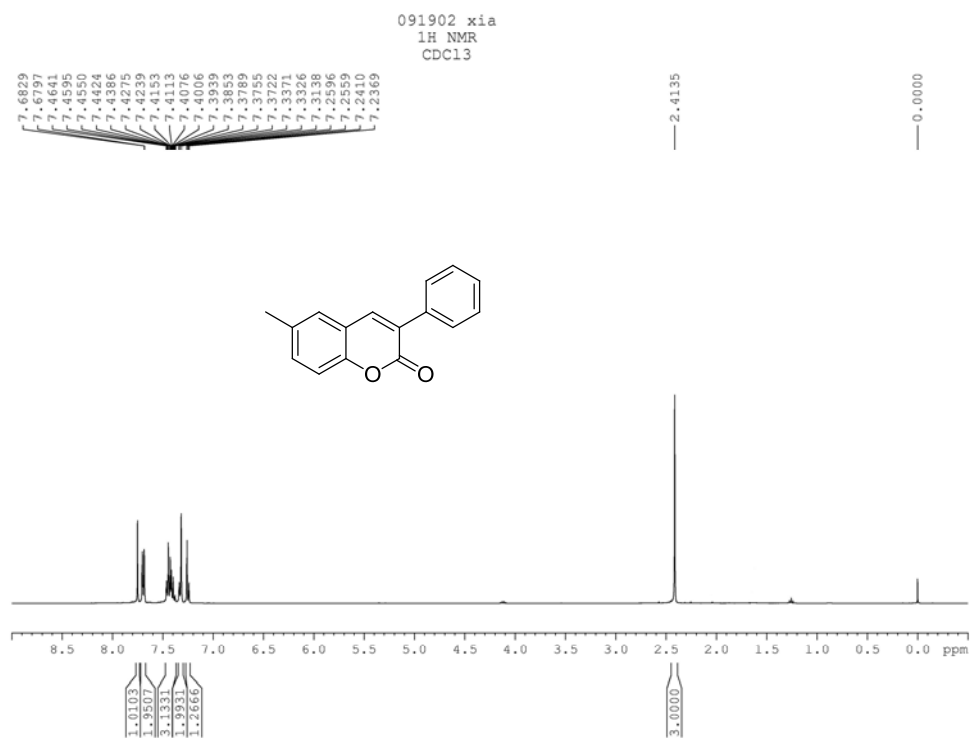

**Fig. 37** <sup>1</sup>H NMR spectrum of **3r**

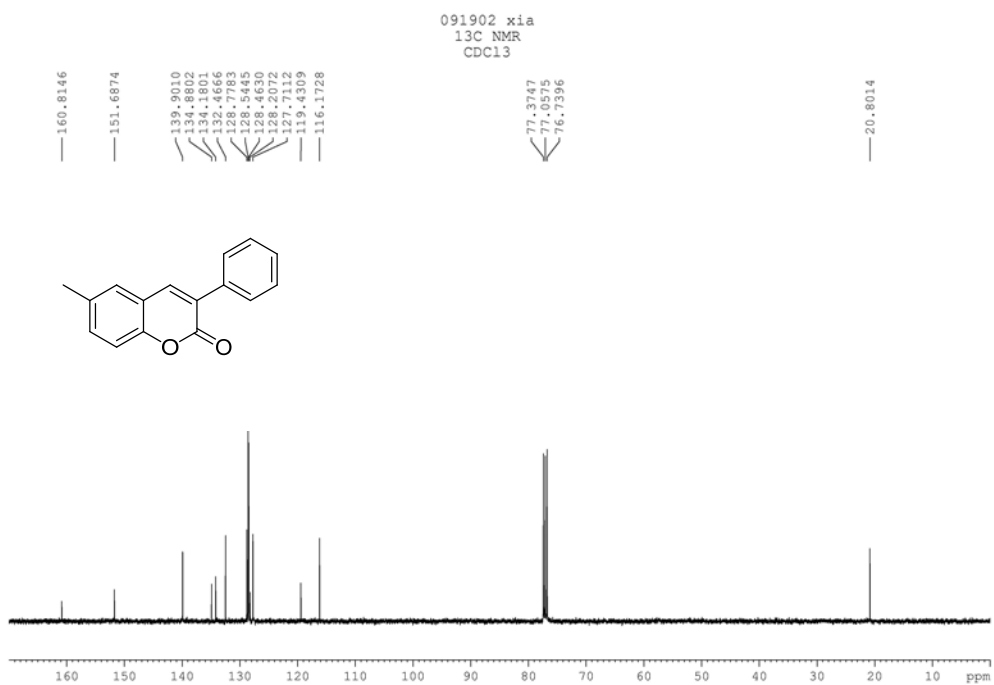

**Fig. 38** <sup>13</sup>C NMR spectrum of **3r**

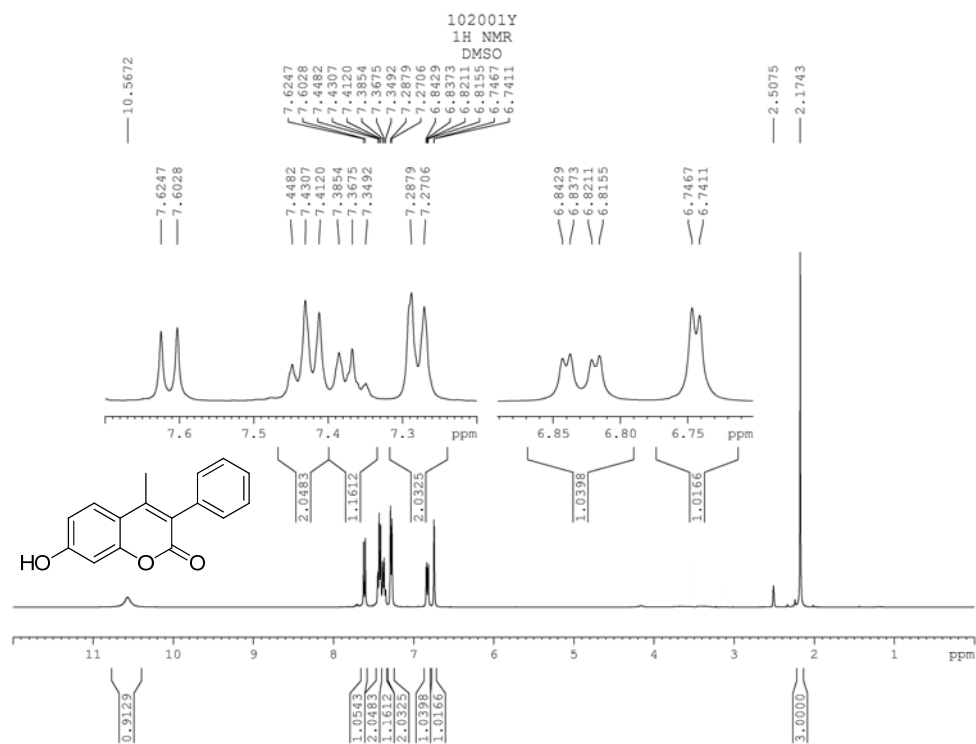

Fig. 39  $^1\text{H}$  NMR spectrum of 3s

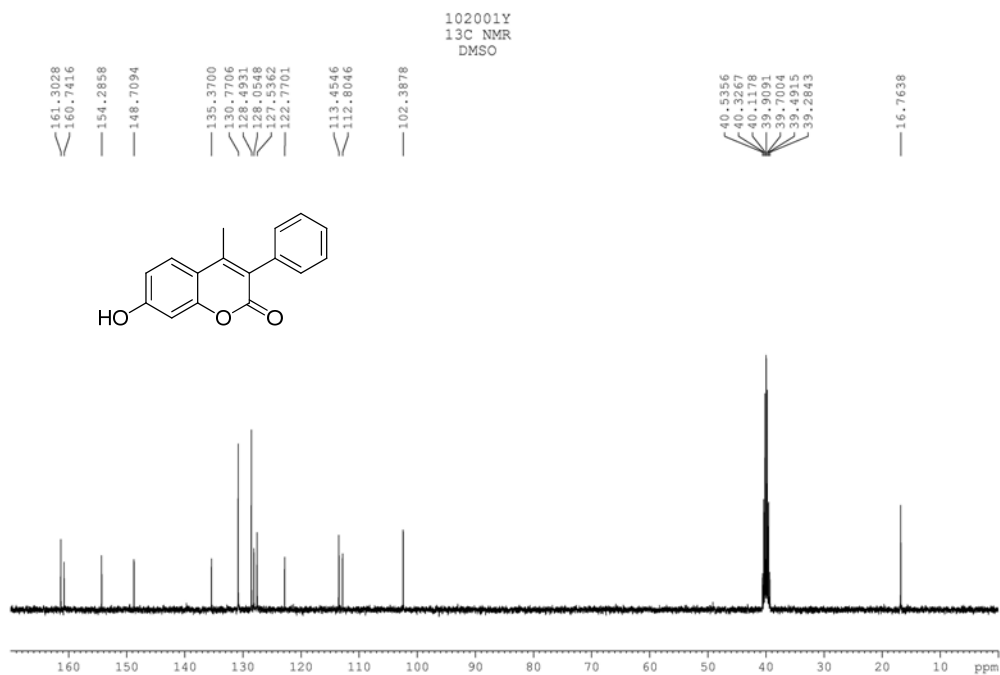

Fig. 40  $^{13}\text{C}$  NMR spectrum of 3s

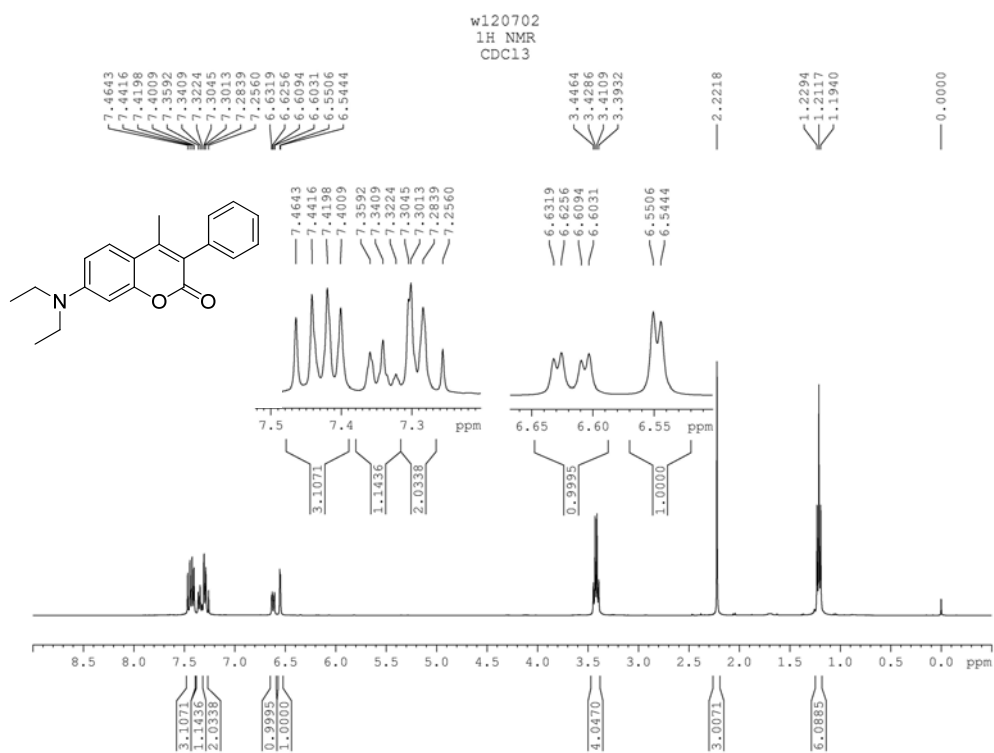

**Fig. 41** <sup>1</sup>H NMR spectrum of **3t**

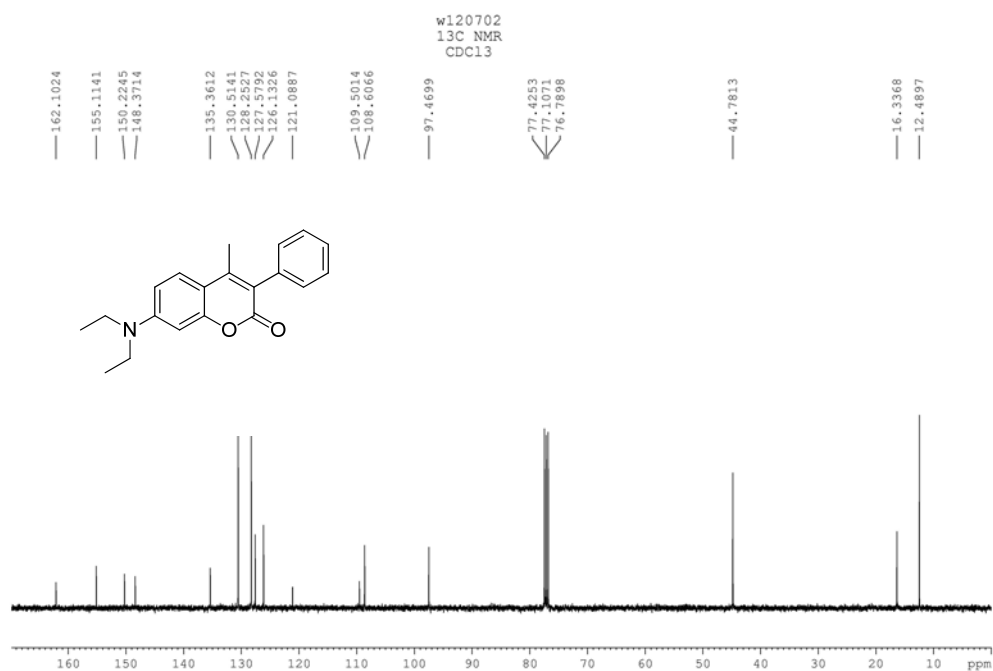

**Fig. 42** <sup>13</sup>C NMR spectrum of **3t**

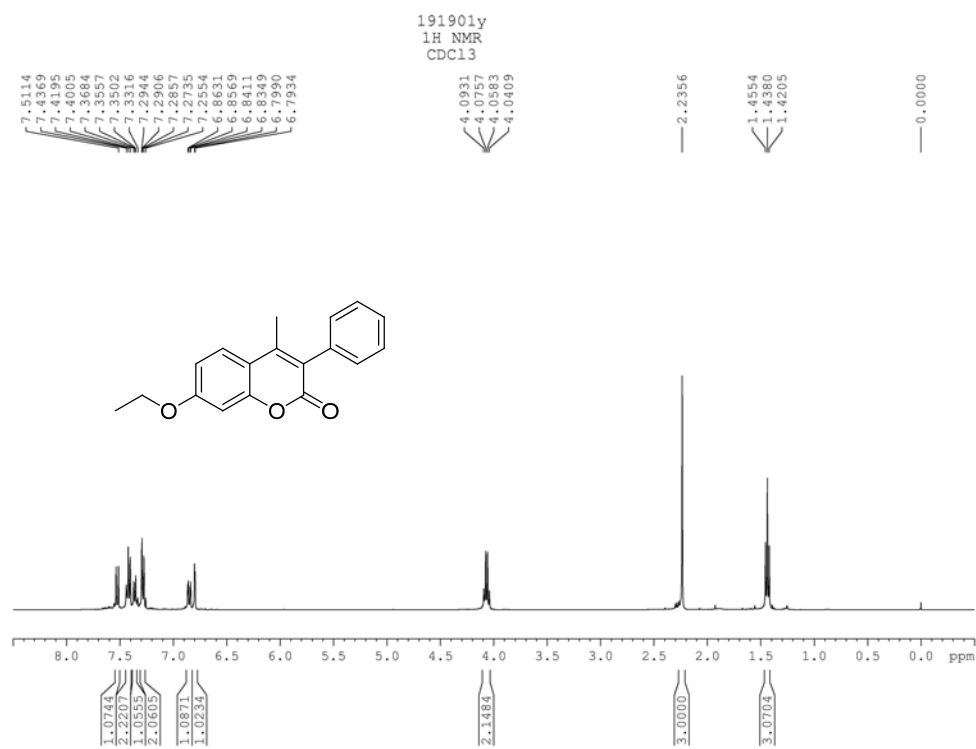

**Fig. 43** <sup>1</sup>H NMR spectrum of **3u**

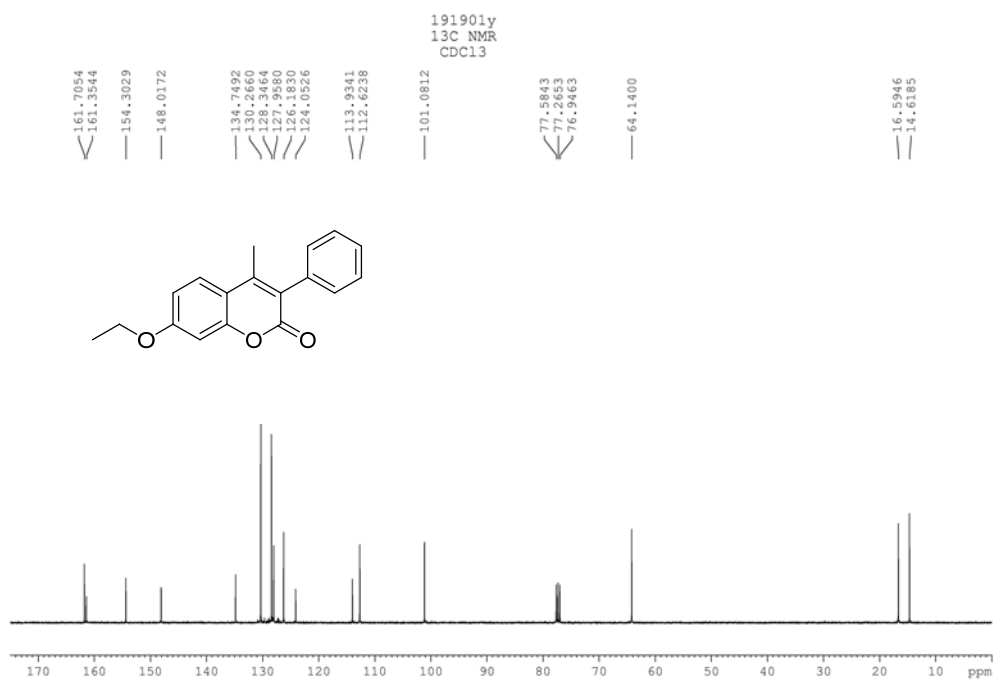

**Fig. 44** <sup>13</sup>C NMR spectrum of **3u**



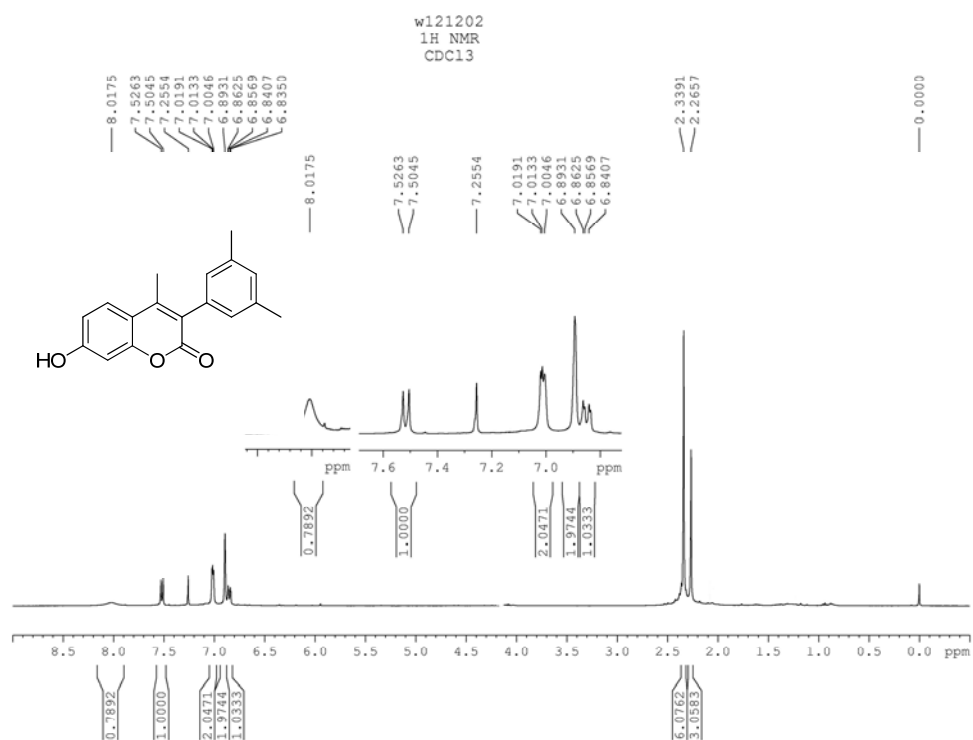

Fig. 45  $^1\text{H}$  NMR spectrum of **3v**

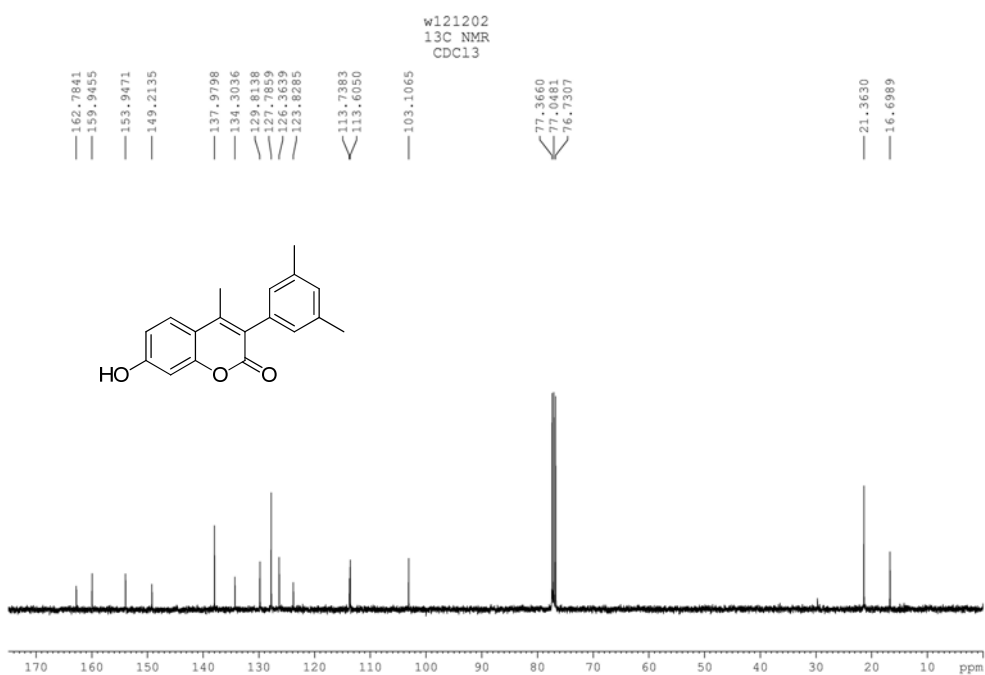

Fig. 46  $^{13}\text{C}$  NMR spectrum of **3v**

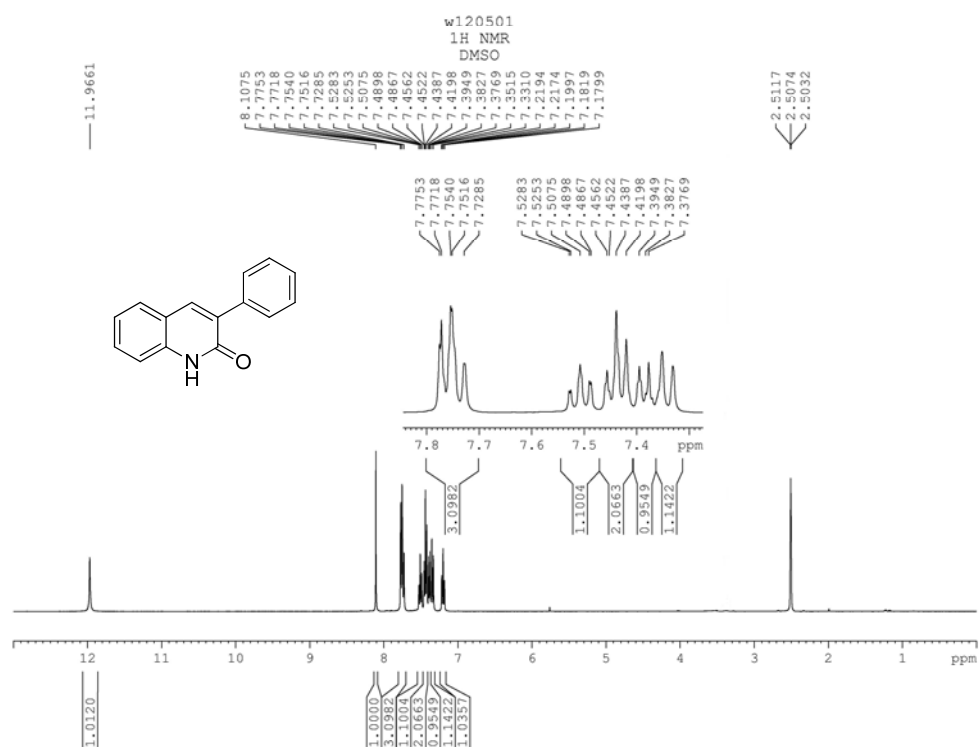

Fig. 47  $^1\text{H}$  NMR spectrum of 5a

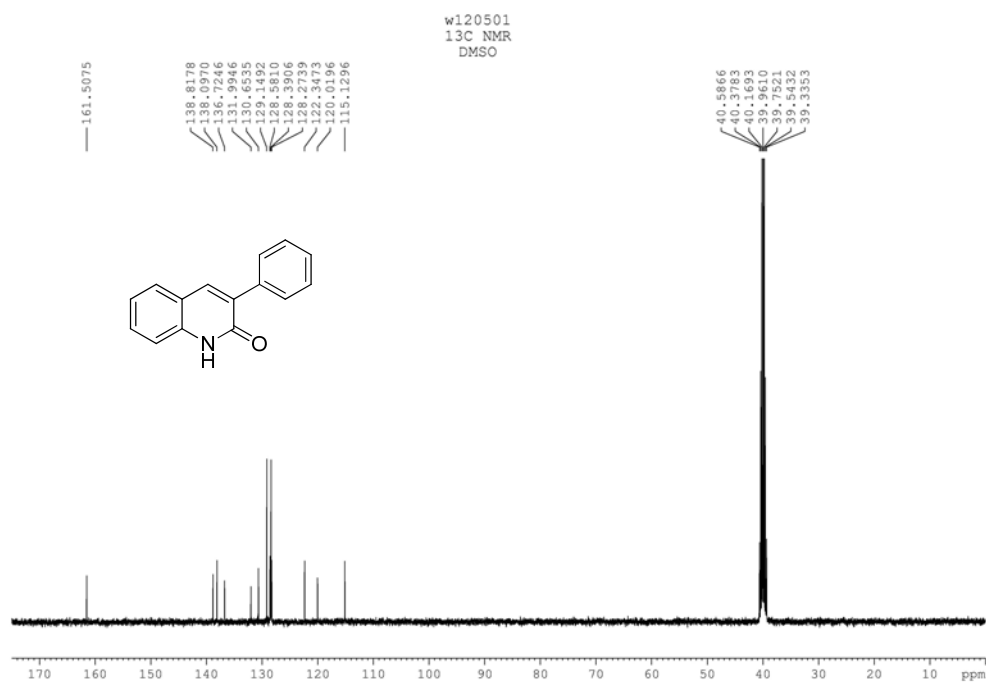

Fig. 48  $^{13}\text{C}$  NMR spectrum of 5a

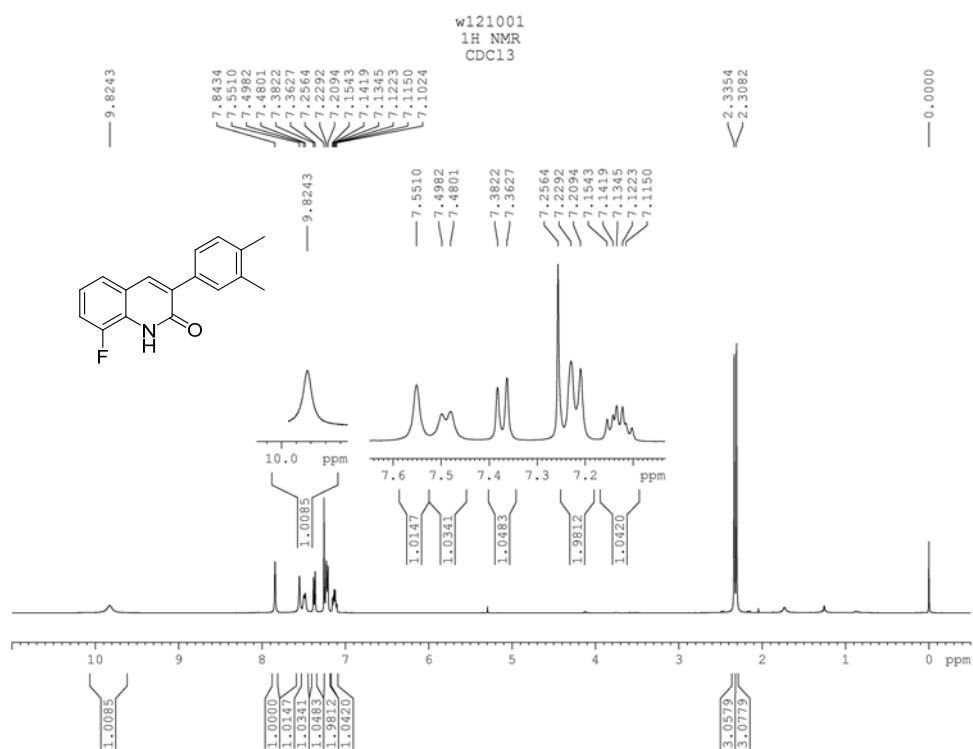

Fig. 49  $^1\text{H}$  NMR spectrum of 5b

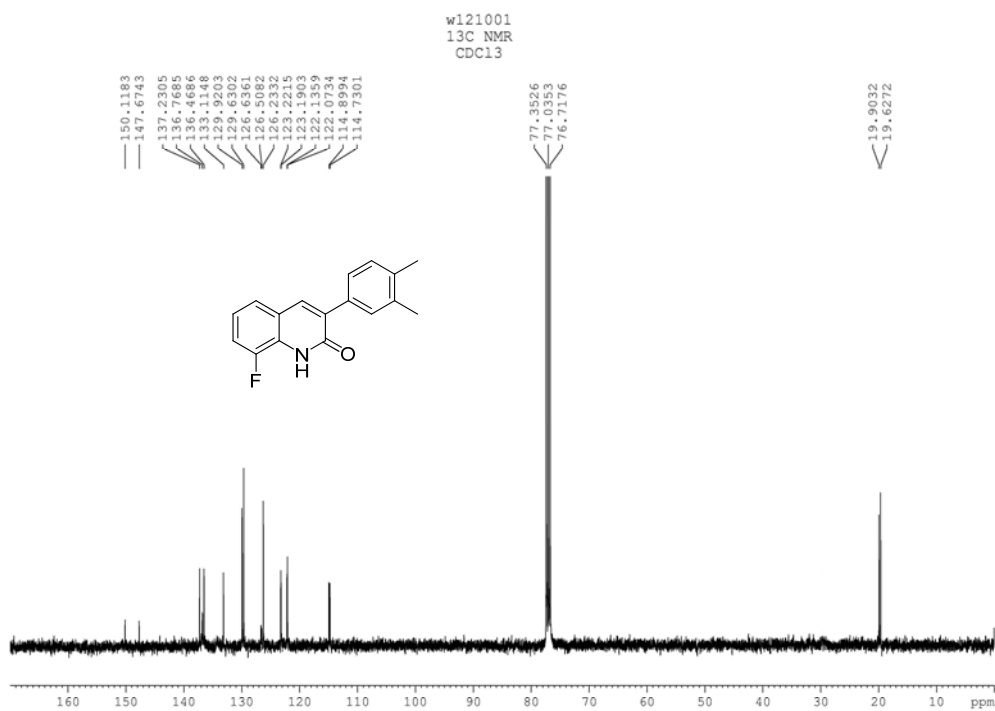

Fig. 50  $^{13}\text{C}$  NMR spectrum of 5b

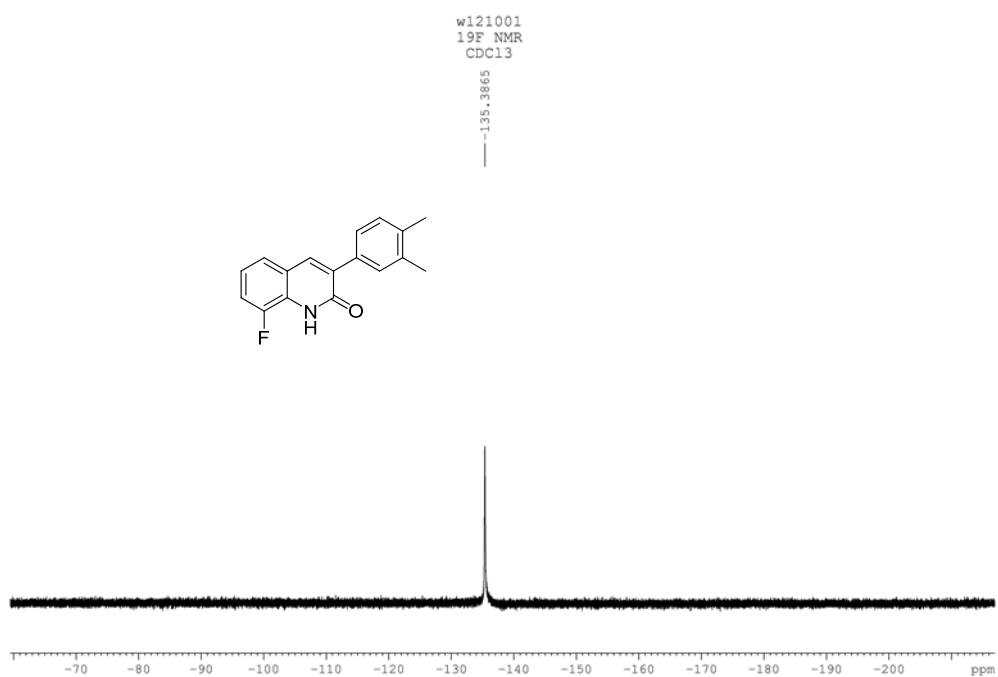

Fig. 51  $^{19}\text{F}$  NMR spectrum of 5b

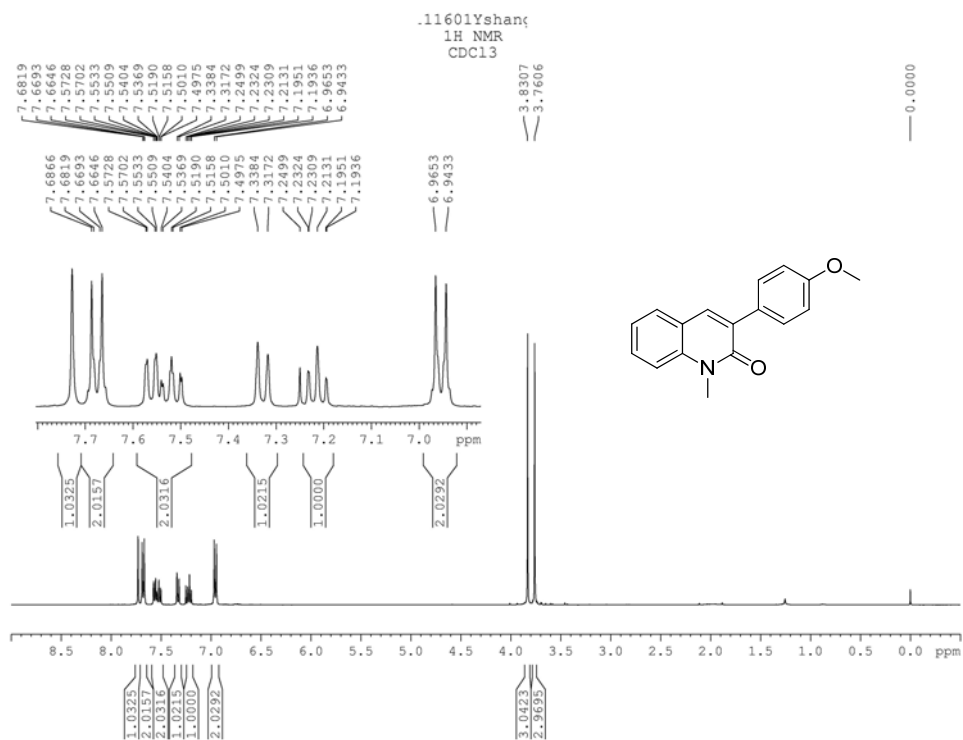

Fig. 52  $^1\text{H}$  NMR spectrum of 5c

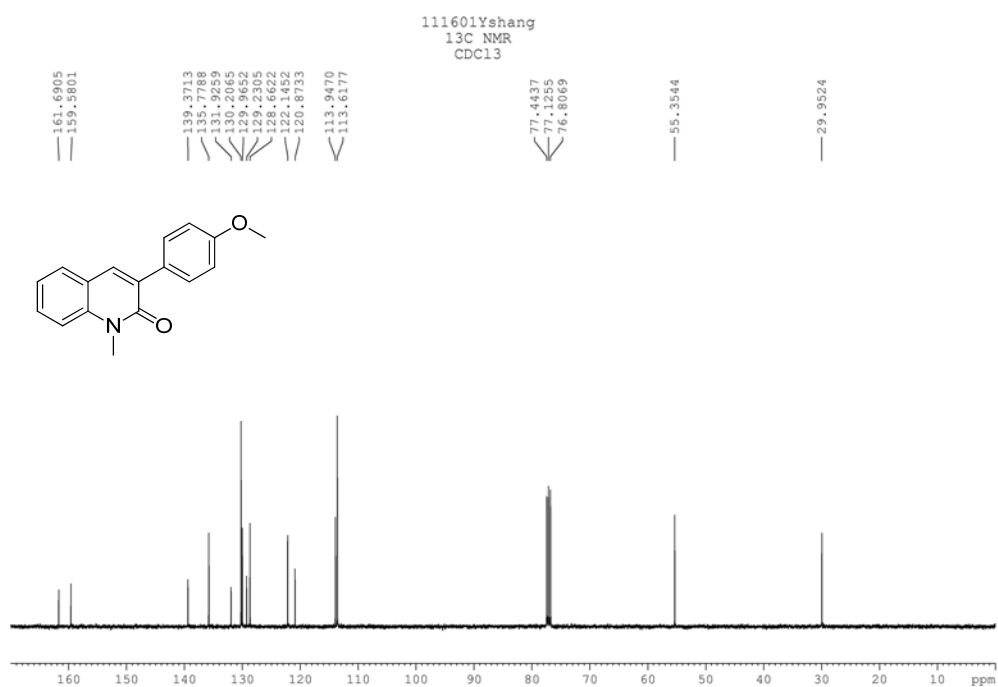

Fig. 53 <sup>13</sup>C NMR spectrum of 5c

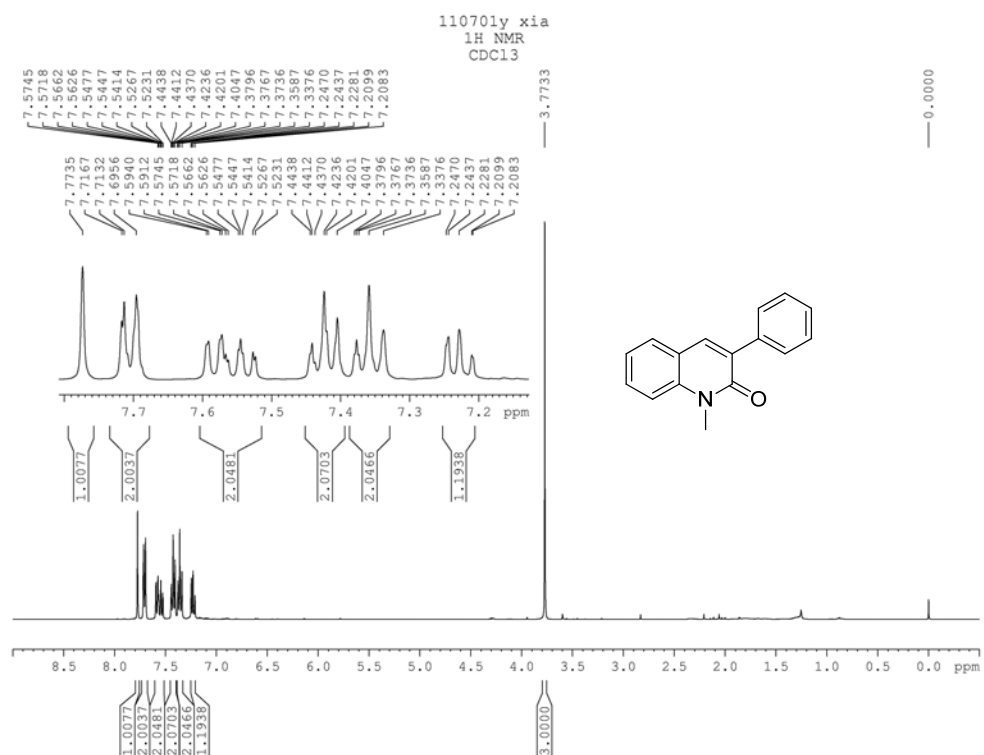

Fig. 54 <sup>1</sup>H NMR spectrum of 5d

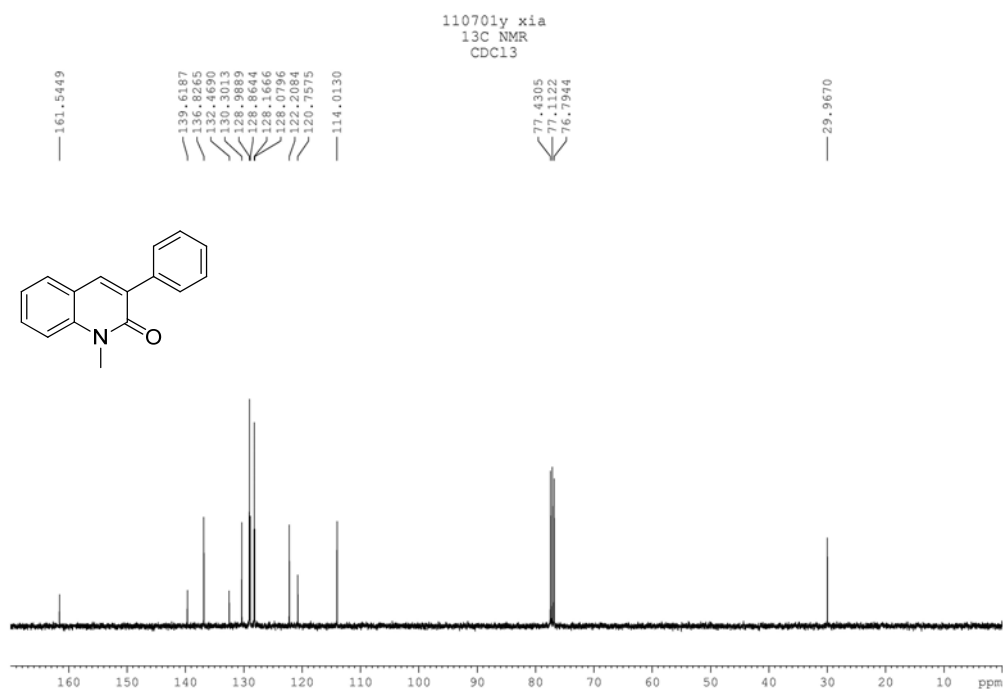

Fig.55 <sup>13</sup>C NMR spectrum of 5d

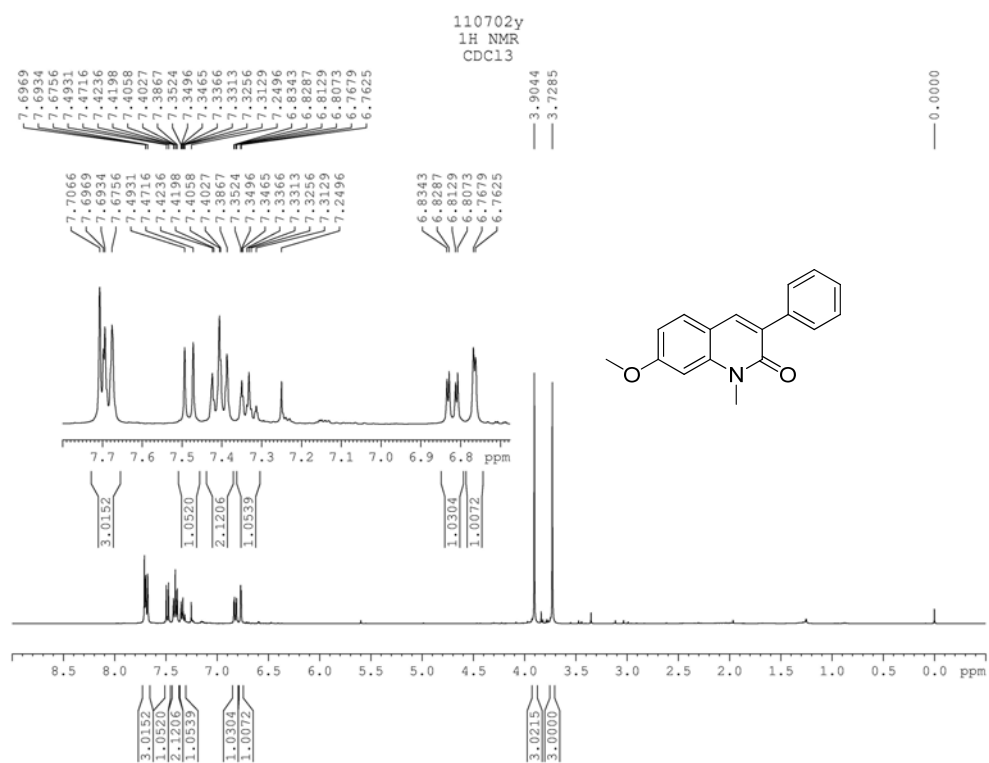

Fig. 56 <sup>1</sup>H NMR spectrum of 5e

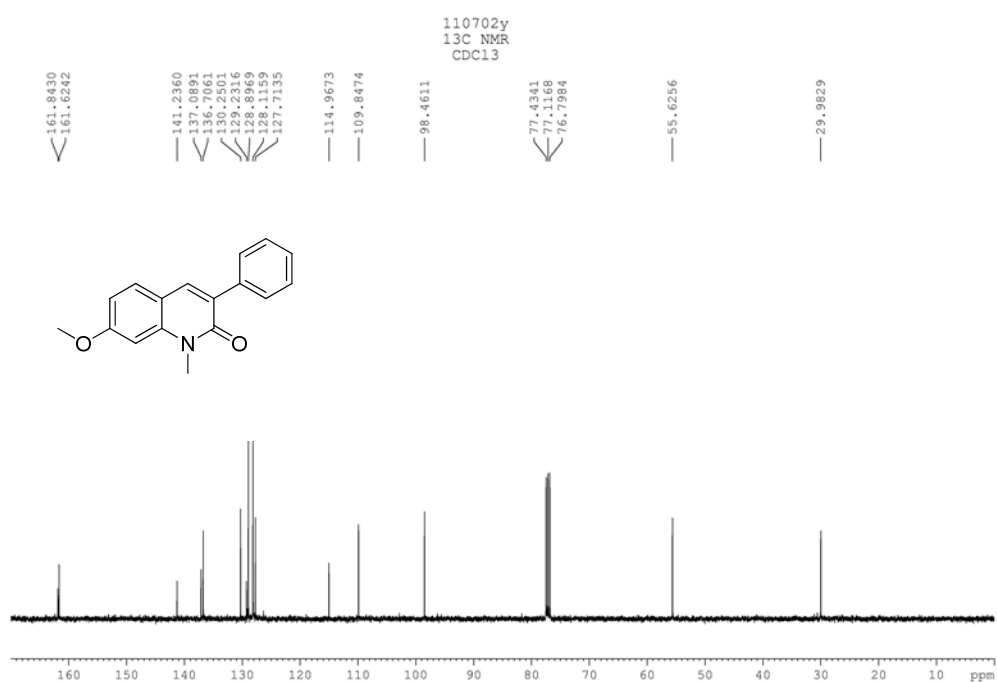

Fig.57 <sup>13</sup>C NMR spectrum of 5e

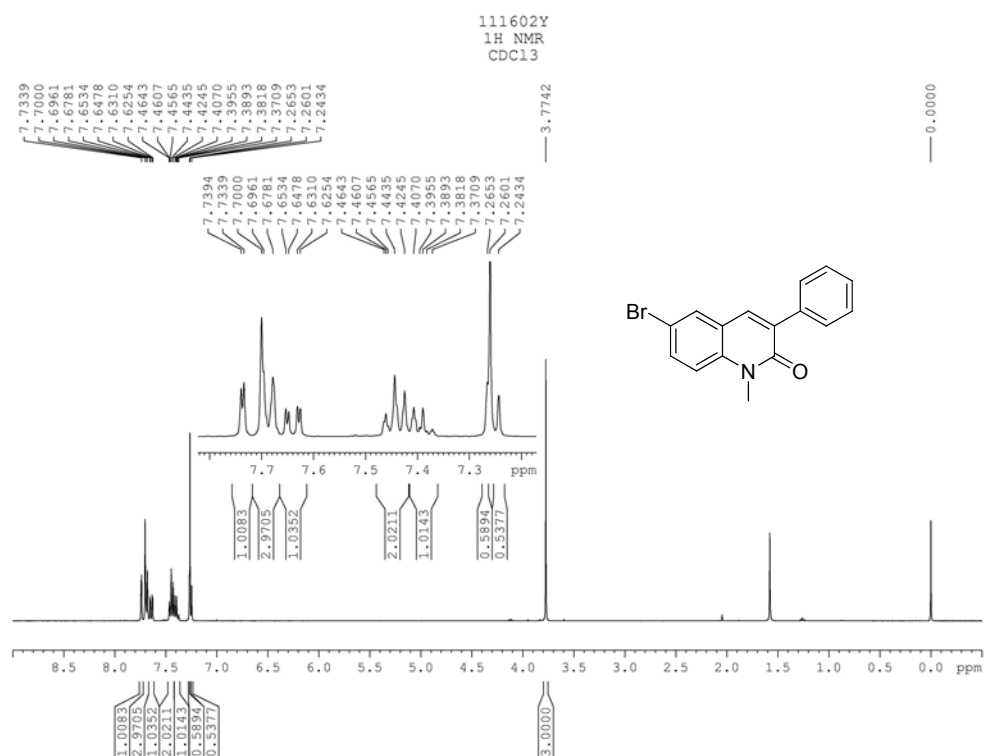

Fig. 58 <sup>1</sup>H NMR spectrum of 5f

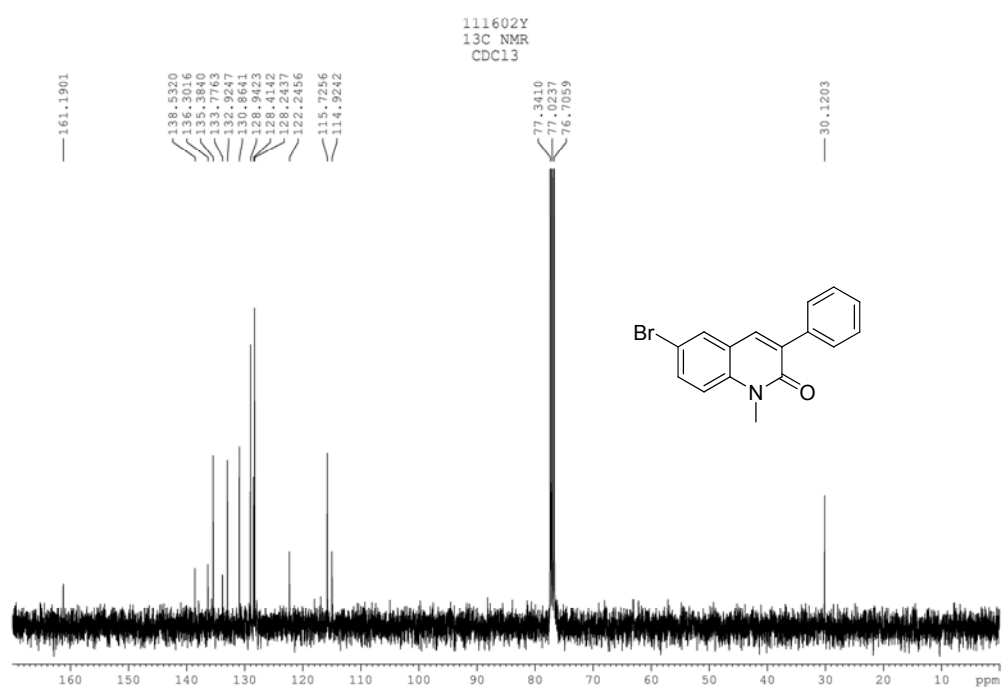

Fig. 59  $^{13}\text{C}$  NMR spectrum of **5f**
